# Supplementary material for: Chinese Medicinal Leech: Ethnopharmacology, Phytochemistry, and Pharmacological Activities
Source: PubMed Central journal article supplement (PMC4870366; doi:10.1155/2016/7895935), 2016-05-04
Supplement: 7895935.f1.pdf [file 7895935.f1.pdf]

## Chinese Medicinal Leech: Ethnopharmacology, Phytochemistry and Pharmacological Activities

Han Dong<sup>1</sup>, Ji-Xiang Ren<sup>2</sup>, Jing-Jing Wang<sup>3,4</sup>, Li-Shuai Ding<sup>3,4</sup>, Jian-Jun Zhao<sup>2</sup>, Song-Yan Liu<sup>4\*</sup>,  
Hui-Min Gao<sup>3,\*</sup>, Zhi-Min Wang<sup>3</sup>

1 Department of Neurology, China-Japan Union Hospital, Jilin University, Changchun, 130033, China; E-Mail: 441652741@qq.com (H. Dong); E-Mail: yan1966@163.com (S.-Y. Liu)

2 The Affiliated Hospital to Changchun University of Chinese Medicine, Changchun 130021, China; E-Mails: renjx2003@163.com (J.-X. Ren); zhaojianjun8777@163.com (J.-J. Zhao)

3 Institute of Chinese Materia Medica, China Academy of Chinese Medical Sciences, Beijing 100700, PR China; National Engineering Laboratory for Quality Control Technology of Chinese Herbal Medicine, Beijing 100700, PR China; E-Mails: jingwqt@163.com (J.-J. Wang); 990698360@qq.com (L.-S. Ding); huimin\_gao@126.com (H.-M. Gao); [zhmw123@263.net](mailto:zhmw123@263.net) (Z.-M. Wang).

4 College of Pharmacy, Henan University of Traditional Chinese Medicine, Zhengzhou 450008, China; E-Mails: jingwqt@163.com (J.-J. Wang); 990698360@qq.com (L.-S. Ding).

\* Author to whom correspondence should be addressed; E-Mail: [yan1966@163.com](mailto:yan1966@163.com) (S.-Y. Liu); huimin\_gao@126.com (H.-M. Gao), Tel.: +86-10-84014128; Fax: +86-10-84014128.

Table S1 Chinese traditional uses of Shuizhi and its formula prescriptions

| Formulae   | Main compositions                                                                                                                                                                                                                                                                                                                                                                                                                                                                                                                                                                                                                                                                                                                                                                                                                                                                                                                                                                                                                     | Clinical uses                                                  | References                      |
|------------|---------------------------------------------------------------------------------------------------------------------------------------------------------------------------------------------------------------------------------------------------------------------------------------------------------------------------------------------------------------------------------------------------------------------------------------------------------------------------------------------------------------------------------------------------------------------------------------------------------------------------------------------------------------------------------------------------------------------------------------------------------------------------------------------------------------------------------------------------------------------------------------------------------------------------------------------------------------------------------------------------------------------------------------|----------------------------------------------------------------|---------------------------------|
| Baiwei Wan | <i>Cynanchi atrati radix et rhizoma</i> (Baiwei), <i>Asari radix et rhizoma</i> (Xixin), <i>Magnoliae officinalis cortex</i> (Houpo), <i>Zanthoxylum bungeanum pericarpium</i> (Huajiao), <i>Platycodonis radix</i> (Jiegeng), <i>Trionycis carapax</i> (Biejia), <i>Saposhnikoviae radix</i> (Fangfeng), <i>Rhei radix et rhizoma</i> (Dahuang), <i>Aconiti lateralis radix praeparata</i> (Fuzi), <i>Sulfur</i> (Liuhuang), <i>Rubia yunnanensis</i> Diels (Zishen), <i>Ginseng radix et rhizoma</i> (Renshen), <i>Taxilli herba</i> (Sangjisheng), <i>Pinelliae rhizoma</i> (Banxia), <i>Bombyx batryticatus</i> (Jiangchan), <i>Dipsaci radix</i> (Xuduan), <i>Gentianae macrophyllae radix</i> (Qinjiao), <i>Asteris radix et rhizoma</i> (Ziwan), <i>Achyranthis bidentatae radix</i> (Niuxi), <i>Tabanus</i> (Mengchong), <b>Hirudo</b> (Shuizhi), <i>Fluoritum</i> (Zishiying), <i>Natrii Sulfas</i> (Mangxiao), <i>Cinnamomi cortex</i> (Rougui), <i>Stalactitum</i> (Zongrushu), <i>Angelicae sinensis radix</i> (Danggui). | Regulating the menstrual function. Treating female infertility | You-you-xin-shu                 |
| Bailao Wan | <i>Angelicae sinensis radix</i> (Danggui), <i>Olibanum</i> (Ruxiang), <i>Myrrha</i> (Moyao), <i>Tabanus</i> (Mengchong), <i>Rhei radix et rhizoma</i> (Dahuang), <i>Ginseng radix et rhizoma</i> (Renshen), <b>Hirudo</b> (Shuizhi), <i>Persicae semen</i> (Taoren).                                                                                                                                                                                                                                                                                                                                                                                                                                                                                                                                                                                                                                                                                                                                                                  | Regulating the menstrual function                              | Jiang-xue-yuan-Gu-fang-xuan-zhu |
| Banmao Wan | <i>Mylabris</i> (Banmao), <i>Moschus</i> (Shexiang), <b>Hirudo</b> (Shuizhi), <i>Glycyrrhizae radix et rhizoma</i> (Gancao), <i>Sojae semen nigrum</i> (Heidou), <i>Rhei radix et rhizoma</i> (Dahuang), <i>Zaocys</i> (Wushaoshe).                                                                                                                                                                                                                                                                                                                                                                                                                                                                                                                                                                                                                                                                                                                                                                                                   | Crewels and carbuncle                                          | Tai-ping-sheng-hui-Fang         |
| Biejia Wan | <i>Trionycis carapax</i> (Biejia), <i>Cinnamomi cortex</i> (Rougui), <i>Vespaes Nidus</i> (Fengfang), <i>Scrophulariae radix</i> (Xuanshen), <i>Zanthoxylum bungeanum pericarpium</i> (Huajiao), <i>Asari radix et rhizoma</i> (Xixin), <i>Ginseng radix et rhizoma</i> (Renshen), <i>Sophorae flavescens radix</i> (Kushen), <i>Salviae miltiorrhizae radix et rhizoma</i> (Danshen), <i>Adenophorae radix</i> (Nanshashen), <i>Euodiae Fructus</i> (Wuzhuyu), <i>Eupolyphaga Seu Steleophaga</i> (Tubiechong),                                                                                                                                                                                                                                                                                                                                                                                                                                                                                                                      | Regulating the menstrual function                              | Qian-jin-yao-fang               |

|                      |                                                                                                                                                                                                                                                                                                                                                                                                                                                                                                                                                                                                                                                                                                                                                                                    |                                                 |                         |
|----------------------|------------------------------------------------------------------------------------------------------------------------------------------------------------------------------------------------------------------------------------------------------------------------------------------------------------------------------------------------------------------------------------------------------------------------------------------------------------------------------------------------------------------------------------------------------------------------------------------------------------------------------------------------------------------------------------------------------------------------------------------------------------------------------------|-------------------------------------------------|-------------------------|
|                      | <i>Hirudo</i> (Shuizhi), <i>Zingiberis Rhizoma</i> (Ganjiang), <i>Moutan cortex</i> (Mudanpi), <i>Aconiti lateralis radix praeparata</i> (Fuji), <i>Gleditsiae abnormalis fructus</i> (Zaojia), <i>Angelicae sinensis radix</i> (Danggui), <i>Paeoniae radix alba</i> (Baishao), <i>Glycyrrhizae radix et rhizoma</i> (Gancao), <i>Oreoselinum</i> (Fangkui), <i>Holotrichiadiomphalia Bates</i> (Qicao), <i>Tabanus</i> (Mengchong), <i>Rhei radix et rhizoma</i> (Dahuang)                                                                                                                                                                                                                                                                                                       |                                                 |                         |
| Dahuang Zhechong Wan | <i>Rhei radix et rhizoma</i> (Dahuang), <i>Scutellariae radix</i> (Huangqin), <i>Glycyrrhizae radix et rhizoma</i> (Gancao), <i>Persicae semen</i> (Taoren), <i>Armeniacae semen amarum</i> (Kuxingren), <i>Paeoniae radix alba</i> (Baishao), <i>Rehmanniae radix</i> (Dihuang), <i>Toxicodendri resina</i> (Ganqi), <i>Tabanus</i> (Mengchong), <b><i>Hirudo</i></b> (Shuizhi), <i>Holotrichiadiomphalia Bates</i> (Qicao), <i>Eupolyphaga seu seleophaga</i> (Tubiechong).                                                                                                                                                                                                                                                                                                      | Promoting blood circulation and removing stasis | Zhang-si-yi-tong        |
| Dahuang Wan          | <i>Rhei radix et rhizome</i> (Dahuang), <i>Persicae semen</i> (Taoren), <i>Toxicodendri resina</i> (Ganqi), <i>Smilacis glabrae rhizoma</i> (Tufuling), <i>Letidii semen</i> (Tinglizi), <i>Achyranthis bidentatae radix</i> (Niuxi), <i>Moutan cortex</i> (Mudanpi), <i>Hirudo</i> (Shuizhi), <i>Chuanxiong Rhizoma</i> (Chuanxiong), <i>Cinnamomi cortex</i> (Rougui), <i>Bupleuri radix</i> (Chaihu), <i>Rubia yunnanensis Diels</i> (Zishen), <i>Ginseng radix et rhizoma</i> (Renshen), <i>Angelicae sinensis radix</i> (Danggui), <i>Zingiberis rhizoma</i> (Ganjiang), <i>Tabanus</i> (Mengchong), <i>Zanthoxylum Bungeanum Pericarpium</i> (Huajiao), <i>Eupolyphaga seu steleophaga</i> (Tubiechong), <i>Euodiae fructus</i> (Wuzhuyu), <i>Rehmanniae radix</i> (Dihuang) | Regulating the menstrual function               | Tai-ping-sheng-hui-Fang |
| Damengchong Wan      | <i>Tabanus</i> (Mengchong), <i>Holotrichiadiomphalia bates</i> (Qicao), <i>Rehmanniae radix</i> (Dihuang), <i>Moutan cortex</i> (Mudanpi), <i>Toxicodendri resina</i> (Ganqi), <i>Paeoniae radix alba</i> (Baishao), <i>Achyranthis bidentatae radix</i> (Niuxi), <i>Trichosanthes Cucumeroides Radix</i> (Tuguagen), <i>Cinnamomi cortex</i> (Rougui), <i>Euodiae fructus</i> (Wuzhuyu), <i>Persicae semen</i> (Taoren), <i>Scutellariae radix</i> (Huangqin), <i>Rubia yunnanensis Diels</i> (Zishen), <i>Poria</i> (Fuling), <i>Sargassum</i> (Haizao), <b><i>Hirudo</i></b> (Shuizhi), <i>Natrii Sulfas</i> (Mangxiao), <i>Ginseng radix et rhizoma</i> (Renshen),                                                                                                             | Regulating the menstrual function               | Qian-jin-yao-fang       |

---

*Letidii semen* (Tinglizi).

---

|                           |                                                                                                                                                                                                                                                                                                                                                                                                                                                                                                                                                                                                                                                                                                                   |                                                                                     |                              |
|---------------------------|-------------------------------------------------------------------------------------------------------------------------------------------------------------------------------------------------------------------------------------------------------------------------------------------------------------------------------------------------------------------------------------------------------------------------------------------------------------------------------------------------------------------------------------------------------------------------------------------------------------------------------------------------------------------------------------------------------------------|-------------------------------------------------------------------------------------|------------------------------|
| Danggui Wan               | <i>Angelicae sinensis radix</i> (Danggui), <i>Letidii semen</i> (Tinglizi), <i>Aconiti lateralis radix praeparata</i> (Fuzi), <i>Euodiae fructus</i> (Wuzhuyu), <i>Rhei radix et rhizoma</i> (Dahuang), <i>Scutellariae radix</i> (Huangqin), <i>Cinnamomi cortex</i> (Rougui), <i>Zingiberis rhizoma</i> (Ganjiang), <i>Moutan cortex</i> (Mudanpi), <i>Chuanxiong rhizoma</i> (Chuanxiong), <i>Asari radix et rhizoma</i> (Xinxi), <i>Zanthoxylum bungeanum pericarpium</i> (Huajiao), <i>Bupleuri radix</i> (Chaihu), <i>Magnoliae officinalis cortex</i> (Houpo), <i>Rubia yunnanensis</i> Diels (Zishen), <i>Glycyrrhizae radix et rhizoma</i> (Gancao), <i>Tabanus</i> (Mengchong), <i>Hirudo</i> (Shuizhi) | Promoting blood circulation and removing stasis                                     | Qian-jin-yao-fang            |
| Didang Wan                | <i>Hirudo</i> (Shuizhi), <i>Tabanus</i> (Mengchong), <i>Persicae semen</i> (Taoren), <i>Rhei radix et rhizoma</i> (Dahuang)                                                                                                                                                                                                                                                                                                                                                                                                                                                                                                                                                                                       | Promoting blood circulation and removing stasis                                     | Dan-xi-xin-fa                |
| Dihuang<br>Tongjing Wan   | <i>Rehmanniae radix praeparata</i> (shudihuang), <i>Tabanus</i> (Mengchong), <i>Hirudo</i> (Shuizhi), <i>Persicae semen</i> (Taoren)                                                                                                                                                                                                                                                                                                                                                                                                                                                                                                                                                                              | Promoting blood circulation and removing stasis                                     | Yi-xue-zheng-zhuan           |
| Dingtong Wan              | <i>Clematidis radix et rhizoma</i> (Weilingxian), <i>Momordicae semen</i> (Mubiezi), <i>Aconiti radix</i> (Chuanwu), <i>Saposhnikoviae radix</i> (Fangfeng), <i>Angelicae dahuricae radix</i> (Baizhi), <i>Faeces trogopterori</i> (Wulingzhi), <i>Pheretima</i> (Dilong), <i>Hirudo</i> (Shuizhi), <i>Cinnabaris</i> (Zhusha)                                                                                                                                                                                                                                                                                                                                                                                    | Promoting blood circulation and removing stasis                                     | Feng-ke-ji-yan-ming-fan<br>g |
| Fangkui Wan               | <i>Oreoselinum</i> (Fangkui), <i>Myrrha</i> (Moyao), <i>Toxicodendri resina</i> (Ganqi), <i>Halite violaceous</i> (Naosha), <i>Hirudo</i> (Shuizhi), <i>Dogbile</i> (Goudan), <i>Curcumae longae rhizome</i> (Jianghuang), <i>Genkwa flos</i> (Yuanhua)                                                                                                                                                                                                                                                                                                                                                                                                                                                           | Promoting blood circulation and removing stasis, stimulating menstruation discharge | Tai-ping-sheng-hui-Fang      |
| Gandihuang<br>Danggui Wan | <i>Rehmanniae radix</i> (Dihuang), <i>Angelicae sinensis radix</i> (Danggui), <i>Glycyrrhizae radix et rhizoma</i> (Gancao), <i>Achyranthis bidentatae radix</i> (Niuxi), <i>Paeoniae radix alba</i> (Baishao), <i>Zingiberis rhizoma</i> (Ganjiang), <i>Lycopi herba</i> (Zelan), <i>Ginseng radix et rhizoma</i> (Renshen), <i>Moutan cortex</i> (Mudanpi), <i>Salviae miltiorrhizae radix et rhizoma</i> (Danshen), <i>Zanthoxylum bungeanum pericarpium</i> (Huajiao), <i>Angelicae dahuricae radix</i> (Baizhi), <i>Scutellariae radix</i>                                                                                                                                                                   | Promoting blood circulation and removing stasis, stimulating menstruation discharge | Qian-jin-yao-fang            |

---

|              |                                                                                                                                                                                                                                                                                                                                                                                                                                                                                                                                                                                                                                                   |                                                                                     |                         |
|--------------|---------------------------------------------------------------------------------------------------------------------------------------------------------------------------------------------------------------------------------------------------------------------------------------------------------------------------------------------------------------------------------------------------------------------------------------------------------------------------------------------------------------------------------------------------------------------------------------------------------------------------------------------------|-------------------------------------------------------------------------------------|-------------------------|
|              | (Huangqin), <i>Cinnamomi cortex</i> (Rougui), <i>Eupolyphaga seu steleophaga</i> (Tubiechong), <i>Chuanxiong rhizoma</i> (Chuanxiong), <i>Persicae semen</i> (Taoren), <i>Hirudo</i> (Shuizhi), <i>Tabanus</i> (Mengchong), <i>Typhae pollen</i> (Puhuang)                                                                                                                                                                                                                                                                                                                                                                                        |                                                                                     |                         |
| Ganjiang Wan | <i>Zingiberis rhizoma</i> (Ganjiang), <i>Bupleuri radix</i> (Chaihua), <i>Paeoniae radix rubra</i> (Chishao), <i>Ginseng radix et rhizoma</i> (Ren Shen), <i>Zanthoxylum bungeanum pericarpium</i> (Huajiao), <i>Natrii sulfas</i> (Xiaoshi), <i>Rhei radix et rhizoma</i> (Dahuang), <i>Angelicae sinensis radix</i> (Danggui), <i>Armeniacae semen amarum</i> (Kuxingren), <i>Chuanxiong rhizoma</i> (Chuanxiong), <i>Hirudo</i> (Shuizhi), <i>Tabanus</i> (Mengchong), <i>Persicae semen</i> (Taoren), <i>Smilacis glabrae rhizoma</i> (Tufuling), <i>Holotrichiadiomphalia bates</i> (Qicao), <i>Eupolyphaga seu steleophaga</i> (Tubiechong) | Promoting blood circulation and removing stasis, stimulating menstruation discharge | Tai-ping-sheng-hui-Fang |
| Ganqi Wan    | <i>Toxicodendri resina</i> (Ganqi), <i>Moutan cortex</i> (Mudanpi), <i>Belamcandae rhizoma</i> (Shegan), <i>Scutellariae radix</i> (Huangqin), <i>Persicae semen</i> (Taoren), <i>Cinnamomi cortex</i> (Rougui), <i>Euodia fructus</i> (Wuzhuyu), <i>Rhei radix et rhizoma</i> (Dahuang), <i>Hirudo</i> (Shuizhi), <i>Bupleuri radix</i> (Chaihua), <i>Artemisia keiskeana fructus</i> (Anzi), <i>Tabanus</i> (Mengchong), <i>Crinis carbonisatus</i> (Xueyutan), <i>Eupolyphaga seu steleophaga</i> (Tubiechong), <i>Holotrichiadiomphalia bates</i> (Qicao), <i>Cannabis fructus</i> (Huomaren), <i>Trionycis carapax</i> (Biejia)              | Regulating the menstrual function. Treating female infertility                      | Tai-ping-sheng-hui-Fang |
| Goudan Wan   | <i>Dogbile</i> (Goudan), <i>Halite violaceous</i> (Naosha), <i>Toxicodendri resina</i> (Ganqi), <i>Genkwa flos</i> (Yuanhua), <i>Corydalis yanhusuo</i> (Yanhusuo), <i>Zingiberis rhizoma</i> (Ganjiang), <i>Mylabris</i> (Banmao), <i>Angelicae sinensis radix</i> (Danggui), <i>Draconis sanguis</i> (Xuejie), <i>Arsenicum sublimatum</i> (Pishuang), <i>Terra flava usta</i> (Fulonggan), <i>Pyritum</i> (Zirantong), <i>Tabanus</i> (Mengchong), <i>Hirudo</i> (Shuizhi)                                                                                                                                                                     | Promoting blood circulation and removing stasis, stimulating menstruation discharge | Tai-ping-sheng-hui-Fang |
| Guijian Wan  | <i>Euonymus alatu ramulus</i> (Guijianyu), <i>Natrii sulfas</i> (Mangxiao), <i>Bupleuri radix</i> (Chaihua), <i>Hirudo</i> (Shuizhi), <i>Tabanus</i> (Mengchong), <i>Rhei radix et rhizoma</i> (Dahuang), <i>Smilacis glabrae</i>                                                                                                                                                                                                                                                                                                                                                                                                                 | Promoting blood circulation and removing stasis, stimulating                        | Tai-ping-sheng-hui-Fang |

|              |                                                                                                                                                                                                                                                                                                                                                                 |                                                                                     |                         |
|--------------|-----------------------------------------------------------------------------------------------------------------------------------------------------------------------------------------------------------------------------------------------------------------------------------------------------------------------------------------------------------------|-------------------------------------------------------------------------------------|-------------------------|
|              | <i>rhizoma</i> (Tufuling), <i>Toxicodendri resina</i> (Ganqi), <i>Zanthoxylum bungeanum pericarpium</i> (Huajia), <i>Letidii semen</i> (Tinglizi), <i>Armeniacae semen amarum</i> (Kuxingren), <i>Persicae semen</i> (Taoren), <i>Moutan cortex</i> (Mudanpi)                                                                                                   | menstruation discharge                                                              |                         |
| Haige Wan    | <i>Concha meretricis seu cyclinae</i> (Geke), <i>Angelicae sinensis radix</i> (Danggui), <i>Lygodii spora</i> (Haijinsha), <i>Calomelas</i> (Qingfen), <i>Sargassum</i> (Haizao), <b>Hirudo</b> (Shuizhi), <i>Indigo naturalis</i> (Qingdai), <i>Talcum</i> (Huashi), <i>Olibanum</i> (Ruxiang), <i>Cinnabaris</i> (Zhusha), <i>Elephantopus scaber</i> (Didan) | Promoting blood and Qi circulation                                                  | Ji-sheng-ba-cui         |
| Heisheng Wan | <i>Crinis carbonisatus</i> (Xueyutan), <i>Carp skin carbonisatus</i> (Chiliyupi), <i>Tabanus</i> (Mengchong), <b>Hirudo</b> (Shuizhi), <i>Sojae semen nigrum</i> (Heidou), <i>Saigae tataricae cornu</i> (Lingyangjiao), <i>Draconis sanguis</i> (Xuejie), <i>Crotonis fructus</i> (Badou)                                                                      | Promoting blood circulation and eliminating blood stasis                            | Tai-ping-sheng-hui-Fang |
| Hupojian Wan | <i>Succinum</i> (Hupo), <i>Tabanus</i> (Mengchong), <b>Hirudo</b> (Shuizhi), <i>Cinnamomi cortex</i> (Rougui), <i>Persicae semen</i> (Taoren), <i>Rhei radix et rhizoma</i> (Dahuang)                                                                                                                                                                           | stimulating menstruation discharge                                                  | Tai-ping-sheng-hui-Fang |
| Hupo Wan     | <i>Succinum</i> (Hupo), <i>Myrrha</i> (Moyao), <i>Angelicae sinensis radix</i> (Danggui), <i>Paeoniae radix rubra</i> (Chishao), <i>Sparganii rhizoma</i> (Sanleng), <i>Trionycis carapax</i> (Biejia), <i>Tabanus</i> (Mengchong), <b>Hirudo</b> (Shuizhi)                                                                                                     | Promoting blood circulation and removing stasis, stimulating menstruation discharge | Tai-ping-sheng-hui-Fang |
| Huashi Wan   | <i>Akebiae caulis</i> (Mutong), <i>Talcum</i> (Huashi), <i>Dianthi herba</i> (Qumai), <i>Lygodii spora</i> (Haijingsha), <i>Kansui radix</i> (Gansui), <i>Tetrapanacis medulla</i> (Tongcao), <b>Hirudo</b> (Shuizhi), <i>Elephantopus scaber</i> (Didan)                                                                                                       | Promoting Qi circulation, clearing damp                                             | Ji-feng-pu-ji-fang      |
| Huagu Wan    | <i>Sparganii rhizoma</i> (Sanleng), <i>Curcumae rhizoma</i> (Ezhu), <i>Toxicodendri resina</i> (Ganqi), <i>Halite violaceous</i> (Naosha), <i>Tabanus</i> (Mengchong), <b>Hirudo</b> (Shuizhi), <i>Succinum</i> (Hupo), <i>Achyranthis bidentatae radix</i> (Niuxi), <i>Cinnamomi cortex</i> (Rougui), <i>Rhei radix et rhizoma</i> (Dahuang)                   | Promoting blood circulation and removing stasis                                     | Shou-shi-bao-yuan       |

|                 |                                                                                                                                                                                                                                                                                                                                                                                                                                                                                                                                                                                                                                                                                                                                                                                            |                                                                    |                                   |
|-----------------|--------------------------------------------------------------------------------------------------------------------------------------------------------------------------------------------------------------------------------------------------------------------------------------------------------------------------------------------------------------------------------------------------------------------------------------------------------------------------------------------------------------------------------------------------------------------------------------------------------------------------------------------------------------------------------------------------------------------------------------------------------------------------------------------|--------------------------------------------------------------------|-----------------------------------|
| Jianxian Wan    | <i>Aconiti lateralis radix praeparata</i> (Fuzi), <i>Euonymus alatus ramulus</i> (Guijianyu), <i>Fluoritum</i> (Zishiying), <i>Alismatis rhizoma</i> (Zexie), <i>Cinnamomi cortex</i> (Rougui), <i>Corydalis yanhusuo</i> (Yanhusuo), <i>Aucklandiae radix</i> (Muxiang), <i>Arecae semen</i> (Binlang), <i>Draconis sanguis</i> (Xuejie), <i>Rhei radix et rhizoma</i> (Dahuang), <i>Persicae semen</i> (Taoren), <i>Sparganii rhizoma</i> (Sanleng), <b>Hirudo</b> (Shuizhi)                                                                                                                                                                                                                                                                                                             | Promoting blood circulation and removing stasis                    | Lei-zheng-zhi-cai<br>Fu-ke-yu-chi |
| Jianghuang Wan  | <i>Curcumae longae rhizoma</i> (Jianghuang), <i>Moutan cortex</i> (Mudanpi), <i>Paeoniae radix rubra</i> (Chishao), <i>Cinnamomi cortex</i> (Rougui), <i>Genkwa flos</i> (Yuanhua), <i>Angelicae sinensis radix</i> (Danggui), <i>Trionycis carapax</i> (Biejia), <i>Succinum</i> (Hupo), <i>Corydalis yanhusuo</i> (Yanhusuo), <i>Euonymus alatus ramulus</i> (Guijianyu), <i>Aucklandiae radix</i> (Muxiang), <i>Halite violaceus</i> (Naosha), <i>Campsis flos</i> (Lingxiaohua), <i>Sparganii rhizoma</i> (Sanleng), <b>Hirudo</b> (Shuizhi), <i>Tabanus</i> (Mengchong), <i>Rhei radix et rhizoma</i> (Dahuang), <i>Toxicodendri resina</i> (Ganqi)                                                                                                                                   | Promoting Qi circulation and stimulating menstruation discharge    | Tai-ping-sheng-hui-Fang           |
| Lingxiaohua Wan | <i>Campsis flos</i> (Lingxiaohua), <i>Myrrha</i> (Moyao), <i>Persicae semen</i> (Taoren), <b>Hirudo</b> (Shuizhi), <i>Talcum</i> (Huashi), <i>Halite violaceus</i> (Naosha), <i>Mylabris</i> (Banmao), <i>Dogbile</i> (Goudan)                                                                                                                                                                                                                                                                                                                                                                                                                                                                                                                                                             | Promoting blood circulation and stimulating menstruation discharge | Tai-ping-sheng-hui-Fang           |
| Linglijia Wan   | <i>Scales carps</i> (Linglijia), <i>Agkistrodon</i> (Fushe), <i>Mylabris</i> (Banmao), <i>Scolopendra</i> (Wugong), <i>Concha meretricis seu cyclinae</i> (Geke), <i>Tabanus</i> (Mengchong), <b>Hirudo</b> (Shuizhi), <i>Spider</i> (Zhizhu), <i>Holotrichiadiomphalia bates</i> (Qicao), <i>Aconiti lateralis radix praeparata</i> (Fuzi), <i>Omphalia</i> (Leiwang), <i>Mercury</i> (Shuiyin), <i>Natrii sulfas</i> (Mangxiao), <i>Rhei radix et rhizoma</i> (Dahuang), <i>Gypsum fibrosum</i> (Shigao), <i>Crotonis fructus</i> (Badou), <i>Cinnamomi cortex</i> (Rougui), <i>Zanthoxylum bungeanum pericarpium</i> (Huajiao), <i>Natrii sulfas</i> (Mangxiao), <i>Dens draconis</i> (Longgu), <i>Alumen</i> (Fanshuihui), <i>Coptidis rhizoma</i> (Huanglian), <i>Talcum</i> (Huashi) | Treating gafeira                                                   | Tai-ping-sheng-hui-Fang           |
| Moyao Wan       | <i>Angelicae sinensis radix</i> (Danggui), <i>Paeoniae radix Alba</i> (Chishao), <i>Cinnamomi cortex</i> (Rougui), <i>Persicae semen</i> (Taoren), <i>Myrrha</i> (Moyao), <i>Tabanus</i> (Mengchong), <b>Hirudo</b>                                                                                                                                                                                                                                                                                                                                                                                                                                                                                                                                                                        | Promoting blood circulation and removing stasis, promoting Qi to   | Fu-ke-yu-chi                      |

|                |                                                                                                                                                                                                                                                                                                                                                                                                                                                                                                                                                                                                                                                        |                                                                               |                         |
|----------------|--------------------------------------------------------------------------------------------------------------------------------------------------------------------------------------------------------------------------------------------------------------------------------------------------------------------------------------------------------------------------------------------------------------------------------------------------------------------------------------------------------------------------------------------------------------------------------------------------------------------------------------------------------|-------------------------------------------------------------------------------|-------------------------|
|                | (Shuizhi)                                                                                                                                                                                                                                                                                                                                                                                                                                                                                                                                                                                                                                              | relieve pain                                                                  |                         |
| Mengchong Wan  | <i>Tabanus</i> (Mengchong), <i>Persicae semen</i> (Taoren), <i>Mantidis ootheca</i> (Sangpiaoxiao), <i>Holotrichiadiomphalia bates</i> (Qicao), <i>Haematitum</i> (Daizheshi), <b><i>Hirudo</i></b> (Shuizhi), <i>Rhei radix et rhizoma</i> (Dahuang)                                                                                                                                                                                                                                                                                                                                                                                                  | Promoting blood circulation and stimulating menstruation discharge            | Tai-ping-sheng-hui-Fang |
| Mudan Wan      | <i>Moutan cortex</i> (Mudanpi), <i>Rhei radix et rhizoma</i> (Dahuang), <i>Paeoniae radix rubra</i> (Chishao), <i>Aucklandiae radix</i> (Muxiang), <i>Persicae semen</i> (Taoren), <i>Tabanus</i> (Mengchong), <b><i>Hirudo</i></b> (Shuizhi), <i>Holotrichiadiomphalia bates</i> (Qicao), <i>Dianthi herba</i> (Qumai), <i>Chuanxiong rhizoma</i> (Chuanxiong), <i>Angelicae sinensis radix</i> (Danggui), <i>Sargassum</i> (Haizao), <i>Cinnamomi cortex</i> (Rougui)                                                                                                                                                                                | Promoting blood circulation and stimulating menstruation discharge            | Tai-ping-sheng-hui-Fang |
| Muli Wan       | <i>Ostreae concha</i> (Muli), <i>Rhei radix et rhizoma</i> (Dahuang), <i>Bupleuri radix</i> (Chaihu), <i>Natrii sulfas</i> (Mangxiao), <i>Zingiberis rhizoma</i> (Ganjiang), <i>Chuanxiong rhizoma</i> (Chuanxiong), <i>Zanthoxylum bungeanum pericarpium</i> (Huajiao), <i>Smilacis glabrae rhizoma</i> (Tufuling), <i>Letidii semen</i> (Tinglizi), <b><i>Hirudo</i></b> (Shuizhi), <i>Armeniacae semen amarum</i> (Kuxingren), <i>Tabanus</i> (Mengchong), <i>Persicae semen</i> (Taoren)                                                                                                                                                           | Promoting blood circulation and stimulating menstruation discharge            | Tai-ping-sheng-hui-Fang |
| Muxiang Wan    | <i>Aucklandiae radix</i> (Muxiang), <i>Sparganii rhizoma</i> (Sanleng), <i>Arecae semen</i> (Binlang), <i>Cinnamomi cortex</i> (Rougui), <i>Aconiti lateralis radix praeparata</i> (Fuzi), <i>Myrrha</i> (Moyao), <i>Ferulae resina</i> (Awei), <i>Persicae semen</i> (Taoren), <i>Trionycis carapax</i> (Biejia), <i>Chuanxiong rhizoma</i> (Chuanxiong), <i>Tabanus</i> (Mengchong), <b><i>Hirudo</i></b> (Shuizhi), <i>Angelicae sinensis radix</i> (Danggui), <i>Moutan cortex</i> (Mudanpi), <i>Paeoniae radix rubra</i> (Chishao), <i>Halite violaceous</i> (Naosha), <i>Rhei radix et rhizoma</i> (Dahuang), <i>Toxicodendri resina</i> (Ganqi) | Treating postpartum blood stasis                                              | Tai-ping-sheng-hui-Fang |
| Naoshajian Wan | <i>Halite violaceous</i> (Naosha), <i>Toxicodendri resina</i> (Ganqi), <i>Rhei radix et rhizoma</i> (Dahuang), <i>Trionycis carapax</i> (Biejia), <i>Myrrha</i> (Moyao), <i>Faeces troglodyteri</i> (Wulingzhi), <i>Dogbile</i> (Goudan), <i>Mylabris</i> (Banmao), <b><i>Hirudo</i></b> (Shuizhi), <i>Crotonis fructus</i> (Badou)                                                                                                                                                                                                                                                                                                                    | Promoting blood circulation and removing stasis, promoting Qi to relieve pain | Tai-ping-sheng-hui-Fang |



|              |                                                                                                                                                                                                                                                                                                                                                                                                    |                                                                                          |                         |
|--------------|----------------------------------------------------------------------------------------------------------------------------------------------------------------------------------------------------------------------------------------------------------------------------------------------------------------------------------------------------------------------------------------------------|------------------------------------------------------------------------------------------|-------------------------|
| Naosha Wan   | <i>Halite violaceus</i> (Naosha), <i>Sulfur</i> (Liuhuang), <i>Genkwa flos</i> (Yuanhua), <i>Myrrha</i> (Moyao), <b><i>Hirudo</i></b> (Shuizhi), <i>Angelicae sinensis radix</i> (Dahuang), <i>Rhei radix et rhizoma</i> (Dahuang), <i>Moutan cortex</i> (Mudanpi), <i>Tabanus</i> (Mengchong)                                                                                                     | Promoting blood circulation and removing stasis                                          | Tai-ping-sheng-hui-Fang |
| Niuxi Wan    | <i>Achyranthis bidentatae radix</i> (Niuxi), <i>Angelicae sinensis radix</i> (Danggui), <i>Atractylodis macrocephalae rhizoma</i> (Baizhu), <i>Chuanxiong rhizoma</i> (Chuanxiong), <i>Cinnamomi cortex</i> (Rougui), <i>Persicae semen</i> (Taoren), <i>Rhei radix et rhizoma</i> (Dahuang), <b><i>Hirudo</i></b> (Shuizhi), <i>Euonymus alatus ramulus</i> (Guijianyu)                           | Promoting blood circulation and stimulating menstruation discharge                       | Tai-ping-sheng-hui-Fang |
| Pengsha Wan  | <i>Borax</i> (Pengsha), <i>Chloriti lapis</i> (Qingmengshi), <i>Squama manitis</i> (Chuanshanjia), <i>Magnetitum</i> (Cishi), <i>Sparganii rhizoma</i> (Sanleng), <i>Toxicodendri resina</i> (Ganqi), <i>Tabanus</i> (Mengchong), <b><i>Hirudo</i></b> (Shuizhi), <i>Crotonis fructus</i> (Badou), <i>Halloysitum rubrum</i> (Chishizhi)                                                           | Promoting blood and Qi circulation                                                       | Tai-ping-sheng-hui-Fang |
| Poyu Dan     | <b><i>Hirudo</i></b> (Shuizhi), <i>Angelicae sinensis radix</i> (Danggui), <i>Paeoniae radix alba</i> (Baishao), <i>Poria</i> (Fuling), <i>Cinnamomi cortex</i> (Rougui), <i>Persicae semen</i> (Taoren), <i>Rehmanniae radix</i> (Dihuang), <i>Aurantii fructus</i> (Zhiqiao), <i>Polypopus</i> (Zhuling)                                                                                         | Eliminating blood stasis                                                                 | Shang-han-bian-zheng-lu |
| Qi'ao Wan    | <i>Rhei radix et rhizoma</i> (Dahuang), <i>Peucedani radix</i> (Qianhu), <i>Natrii sulfas</i> (Mangxiao), <i>Zingiberis rhizoma</i> (Ganjiang), <i>Poria</i> (Fuling), <i>Armeniacae semen amarum</i> (Kuxingren), <i>Zanthoxylum bungeanum pericarpium</i> (Huajiao), <i>Letidii semen</i> (Tinglizi), <i>Persicae semen</i> (Taoren), <b><i>Hirudo</i></b> (Shuizhi), <i>Tabanus</i> (Mengchong) | Stimulating menstruation discharge relieving uneasiness of mind and body tranquilization | Qian-jin-yi-fang        |
| Qicao Wan    | <i>Holotrichiadiomphalia bates</i> (Qicao), <i>Tabanus</i> (Mengchong), <b><i>Hirudo</i></b> (Shuizhi), <i>Mantidis ootheca</i> (Sangpiaoxiao), <i>Dogbile</i> (Goudan), <i>Haematitum</i> (Daizheshi), <i>Rhei radix et rhizoma</i> (Dahuang), <i>Persicae semen</i> (Taoren)                                                                                                                     | Stimulating menstruation discharge                                                       | Tai-ping-sheng-hui-Fang |
| Qilinjie Wan | <i>Draconis sanguis</i> (Xuejie), <i>Myrrha</i> (Moyao), <i>Halite violaceus</i> (Naosha), <i>Dogbile</i> (Goudan), <i>Toxicodendri resina</i> (Ganqi), <i>Genkwa flos</i> (Yuanhua), <i>Corydalis yanhusuo</i> (Yanhusuo), <i>Aconiti lateralis radix praeparata</i> (Fuzi), <i>Aconiti radix</i> (Chuanwu), <i>Angelicae sinensis radix</i>                                                      | Promoting blood circulation and removing stasis, promoting Qi to                         | Tai-ping-sheng-hui-Fang |

|                                |                                                                                                                                                                                                                                                                                                                                                                                                                                                                                                                                                                                                                                                                                                                                                                                                                                                                                                                                                                                                                                                                                                                                                                                                                                                                                                                                                                                                                                                                                                                                                                                                                                                                                                         |                                                                                |                         |
|--------------------------------|---------------------------------------------------------------------------------------------------------------------------------------------------------------------------------------------------------------------------------------------------------------------------------------------------------------------------------------------------------------------------------------------------------------------------------------------------------------------------------------------------------------------------------------------------------------------------------------------------------------------------------------------------------------------------------------------------------------------------------------------------------------------------------------------------------------------------------------------------------------------------------------------------------------------------------------------------------------------------------------------------------------------------------------------------------------------------------------------------------------------------------------------------------------------------------------------------------------------------------------------------------------------------------------------------------------------------------------------------------------------------------------------------------------------------------------------------------------------------------------------------------------------------------------------------------------------------------------------------------------------------------------------------------------------------------------------------------|--------------------------------------------------------------------------------|-------------------------|
|                                | (Danggui), <i>Arsenicum sublimatum</i> (Pishuang), <i>Terra flava usta</i> (Fulonggan), <i>Tabanus</i> (Mengchong), <b><i>Hirudo</i></b> (Shuizhi), <i>Crotonis fructus</i> (Badou)                                                                                                                                                                                                                                                                                                                                                                                                                                                                                                                                                                                                                                                                                                                                                                                                                                                                                                                                                                                                                                                                                                                                                                                                                                                                                                                                                                                                                                                                                                                     | relieve pain                                                                   |                         |
| Qinjiao Wan                    | <i>Gentianae macrophyllae radix</i> (Qinjiao), <i>Scrophulariae radix</i> (Xuanshen), <i>Ginseng radix et rhizoma</i> (Renshen), <i>Ampelopsis radix</i> (Bailian), <i>Armadillidium vulgare</i> (Shufu), <i>Angelicae dahuricae radix</i> (Baizhi), <i>Astragali radix</i> (Huangqi), <i>Platycodonis radix</i> (Jiegeng), <i>Vespae nidus</i> (Fengfang), <i>Bombyx batryticatus</i> (Jiangchan), <i>Persicae semen</i> (Taoren), <i>Holotrichiadiomphalia bates</i> (Qicao), <i>Cynanchi atrati radix et rhizoma</i> (Baiwei), <i>Asari radix et rhizoma</i> (Xixin), <i>Ulmus macrocarpae fructus</i> (Wuyi), <i>Rubia yunnanensis</i> Diels (Zishen), <i>Adenophorae radix</i> (Nanshashen), <i>Saposhnikoviae radix</i> (Fangfeng), <i>Glycyrrhizae radix et rhizoma</i> (Gancao), <i>Moutan cortex</i> (Mudanpi), <i>Achyranthis bidentatae radix</i> (Niuxi), <i>Selaginellae herba</i> (Juanbai), <i>Schisandrae chinensis fructus</i> (Wuweizi), <i>Paeoniae radix alba</i> (Baishao), <i>Cinnamomi cortex</i> (Rougui), <i>Rhei radix et rhizoma</i> (Dahuang), <i>Dendrobii caulis</i> (Shihu), <i>Atractylodis macrocephalae rhizoma</i> (Baizhu), <i>Platycladi semen</i> (Baiziren), <i>Poria</i> (Fuling), <i>Angelicae sinensis radix</i> (Danggui), <i>Zingiberis rhizoma</i> (Ganjiang), <i>Lycopi herba</i> (Zelan), <i>Rehmanniae radix</i> (Dihuang), <i>Chuanxiong rhizoma</i> (Chuanxiong), <i>Toxicodendri resina</i> (Ganqi), <i>Whitequartz</i> (Baishiyiing), <i>Fluoritum</i> (Zishiyiing), <i>Aconiti lateralis radix praeparata</i> (Fuzi), <i>Stalactitum</i> (Zhongrushu), <b><i>Hirudo</i></b> (Shuizhi), <i>Tabanus</i> (Mengchong), <i>Tallmonkshoodroot</i> (Mabu) | Regulating menstrual function.<br>Treating female infertility                  | Qian-jin-yao-fang       |
| Shenxiao<br>Lingxiaohua<br>Wan | <i>Campsis flos</i> (Lingxiaohua), <i>Genkwa flos</i> (Yuanhua), <i>Sparganii rhizoma</i> (Sanleng), <i>Aucklandiae radix</i> (Muxiang), <i>Curcumae longae rhizoma</i> (Jianghuang), <b><i>Hirudo</i></b> (Shuizhi), <i>Halite violaceous</i> (Naosha), <i>Mylabris</i> (Banmao)                                                                                                                                                                                                                                                                                                                                                                                                                                                                                                                                                                                                                                                                                                                                                                                                                                                                                                                                                                                                                                                                                                                                                                                                                                                                                                                                                                                                                       | Promoting blood circulation and removing stasis, regulating menstrual function | Tai-ping-sheng-hui-Fang |
| Shenggandihu<br>ang Wan        | <i>Rehmanniae radix</i> (Dihuang), <i>Persicae semen</i> (Taoren), <i>Angelicae sinensis radix</i> (Danggui), <i>Achyranthis bidentatae radix</i> (Niuxi), <i>Rhei radix et rhizoma</i> (Dahuang), <i>Chuanxiong rhizoma</i> (Chuanxiong), <i>Trichosanthes cucumeroides radix</i> (Tuguagen), <i>Paeoniae radix rubra</i> (Chishao), <i>Cinnamomi cortex</i> (Rougui), <i>Natrii sulfas</i> (Mangxiao), <i>Tabanus</i> (Mengchong),                                                                                                                                                                                                                                                                                                                                                                                                                                                                                                                                                                                                                                                                                                                                                                                                                                                                                                                                                                                                                                                                                                                                                                                                                                                                    | Regulating the menstrual function and relieving pain                           | Tai-ping-sheng-hui-Fang |

|              |                                                                                                                                                                                                                                                                                                                                                                                                                                                                                                                                                                                                                                                                                                                                                                                                                                                                                                               |                                                            |                         |
|--------------|---------------------------------------------------------------------------------------------------------------------------------------------------------------------------------------------------------------------------------------------------------------------------------------------------------------------------------------------------------------------------------------------------------------------------------------------------------------------------------------------------------------------------------------------------------------------------------------------------------------------------------------------------------------------------------------------------------------------------------------------------------------------------------------------------------------------------------------------------------------------------------------------------------------|------------------------------------------------------------|-------------------------|
|              | <b>Hirudo</b> (Shuizhi)                                                                                                                                                                                                                                                                                                                                                                                                                                                                                                                                                                                                                                                                                                                                                                                                                                                                                       |                                                            |                         |
| Shengjin Wan | <i>Mercury</i> (Shuiyin), <i>Sulfur</i> (Liuhuang), <i>Trachycarpus wagnerianus cortex</i> (Zonglvpi), <i>Toxicodendri resina</i> (Ganqi), <i>Scales carps</i> (Liyulin), <i>Pyritum</i> (Zirantong), <i>Dogbile</i> (Goudan), <i>Draconis sanguis</i> (Xuejie), <i>Angelicae sinensis radix</i> (Danggui), <i>Corydalis yanhusuo</i> (Yanhusuo), <b>Hirudo</b> (Shuizhi), <i>Tabanus</i> (Mengchong), <i>Zaocys</i> (Wushaoshe), <i>Cinnamomi cortex</i> (Rougui), <i>Crinis carbonisatus</i> (Xueyutan), <i>Myrrha</i> (Moyao)                                                                                                                                                                                                                                                                                                                                                                              | Eliminating blood stasis to relieve pain                   | Tai-ping-sheng-hui-Fang |
| Taohua Wan   | <i>Prunus persica Flos</i> (Taohua), <i>Styrax</i> (Suhexiang), <i>Benzoinum</i> (Anxixiang), <i>Aucklandiae radix</i> (Muxiang), <i>Arecae semen</i> (Binlang), <i>Natrii sulfas</i> (Mangxiao), <b>Hirudo</b> (Shuizhi), <i>Tabanus</i> (Mengchong), <i>Trionycis carapax</i> (Biejia), <i>Draconis sanguis</i> (Xuejie), <i>Aconiti lateralis radix praeparata</i> (Fuzi), <i>Bupleuri radix</i> (Chaihu), <i>Selaginellae herba</i> (Juanbai), <i>Angelicae sinensis radix</i> (Danggui), <i>magnolia flos</i> (Xinyi), <i>Angelicae dahuricae radix</i> (Baizhi), <i>Fluoritum</i> (Zishiying), <i>Limonitum</i> (Yuyuliang), <i>Chuanxiong rhizoma</i> (Chuanxiong), <i>Moutan cortex</i> (Mudanpi), <i>Asari radix et rhizoma</i> (Xixin), <i>Ophiopogonis radix</i> (Maidong), <i>Notopterygii rhizoma et radix</i> (Qianghuo), <i>Cinnamomi cortex</i> (Rougui), <i>Myristicae semen</i> (Roudoukou) | Regulating menstrual function, Treating female infertility | Tai-ping-sheng-hui-Fang |
| TuguagenWan  | <i>Holotrichiadiomphalia bates</i> (Qicao), <i>Rehmanniae radix praeparata</i> (Shudihuang), <i>Moutan cortex</i> (Mudanpi), <i>Toxicodendri Resina</i> (Ganqi), <i>Paeoniae radix rubra</i> (Chishao), <i>Achyranthis bidentatae radix</i> (Niuxi), <i>Trichosanthes cucumeroides radix</i> (Tuguagen), <i>Cinnamomi cortex</i> (Rougui), <i>Persicae semen</i> (Taoren), <i>Scutellariae radix</i> (Huangqin), <i>Rubia yunnanensis</i> Diels (Zishen), <i>Sargassum</i> (Haizao), <i>Poria</i> (Fuling), <i>Tabanus</i> (Mengchong), <b>Hirudo</b> (Shuizhi), <i>Natrii sulfas</i> (Mangxiao), <i>Ginseng radix et rhizoma</i> (Renshen), <i>Euodiae fructus</i> (Wuzhuyu)                                                                                                                                                                                                                                 | Promoting blood and Qi circulation for pain relief         | Ji-feng-pu-ji-fang      |
| Weipi Wan    | <i>Corium erinacei</i> (Weipi), <i>Concha meretricis seu cyclinae</i> (Geke), <i>Tabanus</i> (Mengchong), <i>Holotrichiadiomphalia bates</i> (Qicao), <i>Scales carps</i> (Linglijia), <i>Mylabris</i> (Banmao), <i>Scolopendra</i> (Wugong), <i>Aconiti lateralis radix praeparata</i> (Fuzi), <i>Spider</i> (Zhizhu), <b>Hirudo</b> (Shuizhi), <i>Crotonis fructus</i> (Badou), <i>Omphalia</i> (Leiwan), <i>Mercury</i> (Shuiyin), <i>Rhei radix et</i>                                                                                                                                                                                                                                                                                                                                                                                                                                                    | Treating gafeira                                           | Tai-ping-sheng-hui-Fang |

|                 |                                                                                                                                                                                                                                                                                                                                                                                                                                                                                                                                                                                                                                                                                                                                                                                            |                                                                                           |                         |
|-----------------|--------------------------------------------------------------------------------------------------------------------------------------------------------------------------------------------------------------------------------------------------------------------------------------------------------------------------------------------------------------------------------------------------------------------------------------------------------------------------------------------------------------------------------------------------------------------------------------------------------------------------------------------------------------------------------------------------------------------------------------------------------------------------------------------|-------------------------------------------------------------------------------------------|-------------------------|
|                 | <i>rhizoma</i> (Dahuang), <i>Cinnabaris</i> (Zhusha), <i>Cinnamomi cortex</i> (Rougui), <i>Coptidis rhizoma</i> (Huanglian), <i>Gypsum fibrosum</i> (Shigao), <i>Natrii sulfas</i> (Mangxiao), <i>Dens draconis</i> (Longgu), <i>Zanthoxylum bungeanum pericarpium</i> (Huajia), <i>Kansui radix</i> (Gansui), <i>Alumen</i> (Baifanhui), <i>Talcum</i> (Huashi)                                                                                                                                                                                                                                                                                                                                                                                                                           |                                                                                           |                         |
| Wulai Wan       | <i>Corium erinacei</i> (Weipi), <i>Concha meretricis seu cyclinae</i> (Geke), <i>Agkistrodon</i> (Fushe), <i>Tabanus</i> (Mengchong), <i>Holotrichiadiomphalia bates</i> (Qicao), <i>Scales carps</i> (Linglijia), <i>Mylabris</i> (Banmao), <i>Scolopendra</i> (Wugong), <i>Aconiti lateralis radix praeparata</i> (Fuzi), <i>Spider</i> (Zhizhu), <b>Hirudo</b> (Shuizhi), <i>Omphalia</i> (Leiwan), <i>Crotonis fructus</i> (Badou), <i>Mercury</i> (Shuiyin), <i>Rhei radix et rhizoma</i> (Dahuang), <i>Cinnamomi cortex</i> (Rougui), <i>Coptidis rhizoma</i> (Huanglian), <i>Gypsum fibrosum</i> (Shigao), <i>Zanthoxylum bungeanum pericarpium</i> (Huajiao), <i>Natrii sulfas</i> (Mangxiao), <i>Dens draconis</i> (Longgu), <i>Kansui radix</i> (Gansui), <i>Talcum</i> (Huashi) |                                                                                           | Wai-tai-mi-yao          |
| Xijiao Wan      | <i>Cornu rhinocerotis</i> (Xijiao), <b>Hirudo</b> (Shuizhi), <i>Glycyrrhizae radix et rhizoma</i> (Gancao), <i>Sojae semen nigrum</i> (Heidou)                                                                                                                                                                                                                                                                                                                                                                                                                                                                                                                                                                                                                                             | Treating anal fistula                                                                     | Tai-ping-sheng-hui-Fang |
| Xiaoshida Wan   | <i>Natrii sulfas</i> (Mangxiao), <i>Zanthoxylum bungeanum pericarpium</i> (Huajiao), <b>Hirudo</b> (Shuizhi), <i>Tabanus</i> (Mengchong), <i>Rhei radix et rhizoma</i> (Dahuang), <i>Poria</i> (Fuling), <i>Bupleuri radix</i> (Chaihu), <i>Chuanxiong rhizoma</i> (Chuanxiong), <i>Holotrichiadiomphalia bates</i> (Qicao)                                                                                                                                                                                                                                                                                                                                                                                                                                                                | Promoting blood circulation and removing stasis, clearing heat and detoxifying            | Qian-jin-yi-fang        |
| Xuegu Wan       | <i>Sparganii rhizoma</i> (Sanleng), <i>Curcumae rhizoma</i> (Ezhu), <i>Toxicodendri resina</i> (Ganqi), <i>Achyranthis bidentatae radix</i> (Niuxi), <i>Tabanus</i> (Mengchong), <b>Hirudo</b> (Shuizhi), <i>Cinnamomi cortex</i> (Rougui), <i>Succinum</i> (Hupo), <i>Rhei radix et rhizoma</i> (Dahuang), <i>Halite violaceous</i> (Naosha)                                                                                                                                                                                                                                                                                                                                                                                                                                              | Promoting blood circulation and removing stasis                                           | Shang-bian-qi-fang      |
| Yuanhuajian Wan | <i>Genkwa flos</i> (Yuanhua), <i>Halite violaceous</i> (Naosha), <i>Achyranthis bidentatae radix</i> (Niuxi), <i>Angelicae sinensis radix</i> (Danggui), <i>Paeoniae radix rubra</i> (Chishao), <i>Citri reticulatae pericarpium</i> (Qingpi), <i>Tabanus</i> (Mengchong), <i>Aucklandiae radix</i> (Muxiang), <b>Hirudo</b>                                                                                                                                                                                                                                                                                                                                                                                                                                                               | Promoting blood circulation, removing stasis, stimulating menstruation discharge for pain | Tai-ping-sheng-hui-Fang |

|                     |                                                                                                                                                                                                                                                                                                                                                                                                                                                                                                                                                                                                                                          |                                                                          |                    |
|---------------------|------------------------------------------------------------------------------------------------------------------------------------------------------------------------------------------------------------------------------------------------------------------------------------------------------------------------------------------------------------------------------------------------------------------------------------------------------------------------------------------------------------------------------------------------------------------------------------------------------------------------------------------|--------------------------------------------------------------------------|--------------------|
|                     | (Shuizhi), <i>Rhei radix et rhizoma</i> (Dahuang), <i>Cinnamomi cortex</i> (Rougui), <i>Succinum</i> (Hupo)                                                                                                                                                                                                                                                                                                                                                                                                                                                                                                                              | relief                                                                   |                    |
| Zaizao Wan          | <i>Hawksbill</i> (Daimao), <i>Borneolum syntheticum</i> (Bingpian), <b>Hirudo</b> (Shuizhi), <i>Scolopendra</i> (Wugong), <i>Ephedrae herba</i> (Mahuang)                                                                                                                                                                                                                                                                                                                                                                                                                                                                                | Clearing heat and detoxifying                                            | Yi-fang-kao        |
| Buqi Xierong Tang   | <i>Cimicifugae rhizoma</i> (Shengma), <i>Forsythiae fructus</i> (Lianqiao), <i>Rehmanniae radix</i> (Dihuang), <i>Scutellariae radix</i> (Huangqin), <i>Angelicae sinensis radix</i> (Danggui), <i>Sappan lignum</i> (Sumu), <i>Scorpio</i> (Quanxie), <i>Pheretima</i> (Dilong), <i>Astragali Radix</i> (Huangqi), <i>Coptidis rhizoma</i> (Huanglian), <i>Platycodonis radix</i> (Jiegeng), <i>Glycyrrhizae radix et rhizoma</i> (Gancao), <i>Ginseng radix et rhizoma</i> (Renshen), <i>Populi resina</i> (Hutonglei), <i>Persicae semen</i> (Taoren), <i>Moschus</i> (Shexiang), <i>Tabanus</i> (Mengchong), <b>Hirudo</b> (Shuizhi) | Activating qi for relieving qi stagnation, clearing heat and detoxifying | Yi-fang-kao        |
| Chaihu Cong'er Tang | <i>Forsythiae fructus</i> (Lianqiao), <i>Bupleuri radix</i> (Chaihu), <i>Glycyrrhizae radix et rhizoma</i> (Gancao), <i>Angelicae sinensis radix</i> (Danggui), <i>Ginseng radix et rhizome</i> (Renshen), <b>Hirudo</b> (Shuizhi), <i>Tabanus</i> (Mengchong), <i>Moschus</i> (Shexiang)                                                                                                                                                                                                                                                                                                                                                |                                                                          | Yi-xue-zheng-zhuan |
| Dahuang PuxiaoTang  | <i>Rhei radix et rhizoma</i> (Dahuang), <i>Achyranthis bidentatae radix</i> (Niuxi), <i>Natrii sulfas</i> (Mangxiao), <i>Moutan cortex</i> (Mudanpi), <i>Glycyrrhizae radix et rhizoma</i> (Gancao), <i>Asteris radix et rhizoma</i> (Ziwan), <i>Haematitum</i> (Daizheshi), <i>Persicae semen</i> (Taoren), <i>Tabanus</i> (Mengchong), <b>Hirudo</b> (Shuizhi), <i>Zingiberis rhizoma</i> (Ganjiang), <i>Asari radix et rhizoma</i> (Xixin), <i>Natrii sulfas</i> (Mangxiao), <i>Cannabis fructus</i> (Huomaren)                                                                                                                       | Regulating menstrual function                                            | Qian-jin-yao-fang  |
| Dangpao Tang        | <i>Natrii sulfas</i> (Mangxiao), <i>Persicae semen</i> (Taoren), <i>Poria</i> (Fuling), <i>Moutan cortex</i> (Mudanpi), <i>Rhei radix et rhizoma</i> (Dahuang), <i>Ginseng radix et rhizoma</i> (Renshen), <i>Cinnamomi cortex</i> (Rougui), <i>Paeoniae radix alba</i> (Baishao), <i>Magnoliae officinalis cortex</i> (Houpo), <i>Asari radix et rhizoma</i> (Xixin), <i>Achyranthis bidentatae radix</i> (Niuxi), <i>Angelicae sinensis radix</i> (Danggui), <i>Citri reticulatae pericarpium</i> (Chenpi), <i>Aconiti lateralis radix praeparata</i> (Fuzi), <i>Tabanus</i> (Mengchong), <b>Hirudo</b> (Shuizhi)                      | Treating female infertility                                              | Qian-jin-yi-fang   |

|                        |                                                                                                                                                                                                                                                                                                                                                                                                                                                                                                                                                                                                                                                                                                           |                                                                       |                        |
|------------------------|-----------------------------------------------------------------------------------------------------------------------------------------------------------------------------------------------------------------------------------------------------------------------------------------------------------------------------------------------------------------------------------------------------------------------------------------------------------------------------------------------------------------------------------------------------------------------------------------------------------------------------------------------------------------------------------------------------------|-----------------------------------------------------------------------|------------------------|
| Huangqin<br>Mudna Tang | <i>Scutellariae radix</i> (Huangqin), <i>Moutan cortex</i> (Mudanpi), <i>Persicae semen</i> (Taoren), <i>Dianthi herba</i> (Qumai), <i>Chuanxiong rhizoma</i> (Chuanxiong), <i>Paeoniae radix alba</i> (Baishao), <i>Aurantii fructus immaturus</i> (Zhishi), <i>Belamcandae rhizoma</i> (Shegan), <i>Sargassum</i> (Haizao), <i>Rhei radix et rhizoma</i> (Dahuang), <i>Tabanus</i> (Mengchong), <b>Hirudo</b> (Shuizhi), <i>Holotrichiadiomphalia bates</i> (Qicao)                                                                                                                                                                                                                                     | Promoting blood circulation,<br>stimulating menstruation<br>discharge | Qian-jin-yao-fang      |
| Mangxiao<br>Tang       | <i>Natrii sulfas</i> (Mangxiao), <i>Cinnabaris</i> (Zhusha), <i>Angelicae sinensis radix</i> (Danggui), <i>Paeoniae radix alba</i> (Baishao), <i>Trichosanthes cucumeroides radix</i> (Tuguagen), <b>Hirudo</b> (Shuizhi), <i>Rhei radix et rhizoma</i> (Dahuang), <i>Persicae semen</i> (Taoren)                                                                                                                                                                                                                                                                                                                                                                                                         | Stimulating menstruation<br>discharge                                 | Qian-jin-yao-fang      |
| Mudan<br>Dahuang tang  | <i>Moutan cortex</i> (Mudanpi), <i>Rhei radix et rhizoma</i> (Dahuang), <i>Natrii sulfas</i> (Mangxiao), <i>Persicae semen</i> (Taoren), <i>Ginseng radix et rhizoma</i> (Ren Shen), <i>Poria</i> (Fuling), <b>Hirudo</b> (Shuizhi), <i>Tabanus</i> (Mengchong), <i>Glycyrrhizae radix et rhizoma</i> (Gancao)                                                                                                                                                                                                                                                                                                                                                                                            | Regulating menstrual function for<br>pain relief                      | Qian-jin-yi-fang       |
| Poxue<br>Santeng Tang  | <i>Notopterygii rhizoma et radix</i> (Qianghuo), <i>Saposhnikoviae radix</i> (Fangfeng), <i>Cinnamomi cortex</i> (Rougui), <i>Sappan lignum</i> (Sumu), <i>Forsythiae fructus</i> (Lianqiao), <i>Angelicae sinensis radix</i> (Danggui), <i>Bupleuri radix</i> (Chaihu), <b>Hirudo</b> (Shuizhi), <i>Moschus</i> (Shexiang)                                                                                                                                                                                                                                                                                                                                                                               | Treating traumatic injury and<br>blood stasis                         | Lan-shi-mi-cang        |
| Puxiao<br>Dangpao Tang | <i>Natrii sulfas</i> (Mangxiao), <i>Moutan cortex</i> (Mudanpi), <i>Angelicae sinensis radix</i> (Danggui), <i>Rhei radix et rhizoma</i> (Dahuang), <i>Persicae semen</i> (Taoren), <i>Asari radix et rhizoma</i> (Xixin), <i>Magnoliae officinalis cortex</i> (Houpo), <i>Platycodonis radix</i> (Jiegeng), <i>Paeoniae radix rubra</i> (Chishao), <i>Ginseng radix et rhizoma</i> (Ren Shen), <i>Poria</i> (Fuling), <i>Cinnamomi cortex</i> (Rougui), <i>Glycyrrhizae radix et rhizoma</i> (Gancao), <i>Achyranthis bidentatae radix</i> (Niuxi), <i>Citri reticulatae pericarpium</i> (Chenpi), <i>Tabanus</i> (Mengchong), <b>Hirudo</b> (Shuizhi), <i>Aconiti lateralis radix praeparata</i> (Fuzi) | Treating female infertility                                           | You-you-xin-shu        |
| Sanyu Tang             | <b>Hirudo</b> (Shuizhi), <i>Angelicae sinensis radix</i> (Danggui), <i>Moutan cortex</i> (Mudanpi), <i>Carthami</i>                                                                                                                                                                                                                                                                                                                                                                                                                                                                                                                                                                                       |                                                                       | Shang-han-bian-zheng-l |

|                   |                                                                                                                                                                                                                                                                                                                                                                                                                                                                                                                                                                                                                                                                                           |                                            |                             |
|-------------------|-------------------------------------------------------------------------------------------------------------------------------------------------------------------------------------------------------------------------------------------------------------------------------------------------------------------------------------------------------------------------------------------------------------------------------------------------------------------------------------------------------------------------------------------------------------------------------------------------------------------------------------------------------------------------------------------|--------------------------------------------|-----------------------------|
|                   | <i>flos</i> (Honghua), <i>Glycyrrhizae radix et rhizoma</i> (Gancao), <i>Rehmanniae radix</i> (Dihuang)                                                                                                                                                                                                                                                                                                                                                                                                                                                                                                                                                                                   |                                            | u                           |
| Shagui Potai Tang | <b>Hirudo</b> (Shuizhi), <i>Moutan cortex</i> (Mudanpi), <i>Angelicae sinensis radix</i> (Danggui), <i>Rhei radix et rhizoma</i> (Gancao), <i>Magnoliae officinalis cortex</i> (Houpo), <i>Carthami flos</i> (Honghua), <i>Achyranthis bidentatae radix</i> (Niuxi), <i>Rehmanniae radix</i> (Dihuang), <i>Persicae semen</i> (Taoren)                                                                                                                                                                                                                                                                                                                                                    |                                            | Shang-han-bian-zheng-l<br>u |
| Shengdihuang Tang | <i>Rehmanniae radix</i> (Dihuang), <i>Toxicodendri resina</i> (Ganqi), <i>Lotusroot squeezed juice</i> (Lian'ou'zhi), <i>Tabanus</i> (Mengchong), <b>Hirudo</b> (Shuizhi), <i>Rhei radix et rhizoma</i> (Dahuang)                                                                                                                                                                                                                                                                                                                                                                                                                                                                         |                                            | Lei-zheng-zhi-cai           |
| Taohe Tang        | <i>Eupolyphaga seu steleophaga</i> (Tubiechong), <i>Tabanus</i> (Mengchong), <b>Hirudo</b> (Shuizhi), <i>Cinnamomi cortex</i> (Rougui), <i>Rhei radix et rhizoma</i> (Dahuang), <i>Juglandis semen</i> (Hetaoren)                                                                                                                                                                                                                                                                                                                                                                                                                                                                         | Clearing heat and detoxifying              | Liu-juan-zi-gui-yi-fang     |
| Taoren Tang       | <i>Persicae semen</i> (Taoren), <i>Angelicae sinensis radix</i> (Danggui), <i>Trichosanthes cucumeroides radix</i> (Tuguagen), <i>Rhei radix et rhizoma</i> (Dahuang), <b>Hirudo</b> (Shuizhi), <i>Tabanus</i> (Mengchong), <i>Natrii sulfas</i> (Mangxiao), <i>Achyranthis bidentatae radix</i> (Niuxi), <i>Cannabis fructus</i> (Huomaren), <i>Cinnamomi cortex</i> (Rougui)                                                                                                                                                                                                                                                                                                            | Stimulating menstruation discharge         | Qian-jin-yao-fang           |
| Taozhi Tang       | <i>Persicae ramulus</i> (Taozhi), <i>Natrii sulfas</i> (Mangxiao), <i>Rhei radix et rhizoma</i> (Dahuang), <i>Angelicae sinensis radix</i> (Danggui), <i>Glycyrrhizae radix et rhizoma</i> (Gancao), <i>Cinnamomi cortex</i> (Rougui), <i>Tabanus</i> (Mengchong), <b>Hirudo</b> (Shuizhi), <i>Persicae semen</i> (Taoren)                                                                                                                                                                                                                                                                                                                                                                | Treating traumatic injury and blood stasis | Wai-tai-mi-yao              |
| Xierong Tang      | <i>Forsythiae fructus</i> (Lianqiao), <i>Cimicifugae rhizome</i> (Shengma), <i>Platycodonis radix</i> (Jiegeng), <i>Scutellariae radix</i> (Huangqin), <i>Rehmanniae radix</i> (Dihuang), <i>Astragali radix</i> (Huangqi), <i>Sappan lignum</i> (Sumu), <i>Coptidis rhizoma</i> (Huanglian), <i>Pheretima</i> (Dilong), <i>Scorpio</i> (Quanxie), <i>Angelicae sinensis radix</i> (Danggui), <i>Amomumkravanh pirreex grgnep</i> (Baidoukou), <i>Ginseng radix et rhizoma</i> (Renshen), <i>Glycyrrhizae radix et rhizoma</i> (Gancao), <i>Populi resina</i> (Wutonglei), <i>Moschus</i> (Shexiang), <i>Persicae semen</i> (Taoren), <i>Tabanus</i> (Mengchong), <b>Hirudo</b> (Shuizhi) | Clearing heat and detoxifying              | Lan-shi-mi-cang             |

|                            |                                                                                                                                                                                                                                                                                                                                                                                                                                                                                                                                                            |                                                                |                             |
|----------------------------|------------------------------------------------------------------------------------------------------------------------------------------------------------------------------------------------------------------------------------------------------------------------------------------------------------------------------------------------------------------------------------------------------------------------------------------------------------------------------------------------------------------------------------------------------------|----------------------------------------------------------------|-----------------------------|
| Xingren Tang               | <i>Armeniacae semen amarum</i> (Kuxingren), <i>Persicae semen</i> (Taoren), <i>Rhei radix et rhizoma</i> (Dihuang), <b>Hirudo</b> (Shuizhi), <i>Tabanus</i>                                                                                                                                                                                                                                                                                                                                                                                                | Promoting blood circulation and regulating menstrual function  | Qian-jin-yao-fang           |
| Yanmi Tang                 | <i>Euodiae fructus</i> , <i>Rhei radix et rhizoma</i> , <i>Angelicae sinensis radix</i> , <i>Zingiberis rhizoma</i> , <i>Tabanus</i> , <b>Hirudo</b> (Shuizhi), <i>Rehmanniae radix</i> (Dihuang), <i>Chuanxiong rhizoma</i> (Chuanxiong), <i>Gardeniae fructua</i> (Zhizi), <i>Persicae semen</i> (Taoren), <i>Paeoniae radix alba</i> (Baishao), <i>Asari radix et rhizome</i> (Xixin), <i>Glycyrrhizae radix et rhizoma</i> (Gancao), <i>Cinnamomi cortex</i> (Rougui), <i>Achyranthis bidentatae radix</i> (Niuxi), <i>Cannabis fructus</i> (Huomaren) | Regulating menstrual function for pain relief                  | Qian-jin-yi-fang            |
| Yishi Miegua<br>Tang       | <i>Ginseng radix et rhizoma</i> (Renshen), <i>Corni fructus</i> (Shanzhuyu), <i>Angelicae sinensis radix</i> (Danggui), <i>Olibanum</i> (Ruxiang), <i>Tabanus</i> (Mengchong), <b>Hirudo</b> (Shuizhi), <i>Faeces bombycis</i> (Chansha)                                                                                                                                                                                                                                                                                                                   |                                                                | Shang-han-bian-zheng-l<br>u |
| Zhuyu<br>Mengchong<br>Tang | <i>Euodiae fructus</i> (Wuzhuyu), <i>Tabanus</i> (Mengchong), <b>Hirudo</b> (Shuizhi), <i>Eupolyphaga seu steleophaga</i> (Tubiechong), <i>Moutan cortex</i> (Mudanpi), Fresh ginger (Shengjiang), <i>Triticum aestivum</i> (Xiaomai), <i>Pinelliae rhizome</i> (Banxia), <i>Jujubae fructus</i> (Dazao), <i>Persicae semen</i> (Taoren), <i>Ginseng radix et rhizome</i> (Renshen), <i>Achyranthis bidentatae radix</i> (Niuxi), <i>Cinnamomi cortex</i> (Rougui), <i>Glycyrrhizae radix et rhizoma</i> (Gancao), <i>Paeoniae radix alba</i> (Baishao)    | Warming spleen and stomach for regulating menstrual function   | Qian-jin-yao-fang           |
| Banmao San                 | <i>Mylabris</i> (Banmao), <i>Rhei radix et rhizoma</i> (Dahuang), <b>Hirudo</b> (Shuizhi), <i>Angelicae sinensis radix</i> (Danggui), <i>Tabanus</i> (Mengchong)                                                                                                                                                                                                                                                                                                                                                                                           | Simulating menstrual function                                  | Tai-ping-sheng-hui-Fang     |
| Bisheng San                | <i>Halite violaceous</i> (Naosha), <i>Draconis sanguis</i> (Xuejie), <i>Myrrha</i> (Moyao), <i>Hippocampus</i> (Haima), <i>Cinnamomi cortex</i> (Rougui), <i>Aucklandiae radix</i> (Muxiang), <i>Cinnabaris</i> (Zhusha), <i>Toxicodendri resina</i> (Ganqi), <i>Tabanus</i> (Mengchong), <i>Borneolum syntheticum</i> (Bingpian), <b>Hirudo</b> (Shuizhi), <i>Angelicae sinensis radix</i> (Danggui), <i>Borax</i> (Pengsha), <i>Ferulae resina</i> (Awei)                                                                                                | Clearing heat and promoting fluid production, stoping bleeding | Ji-feng-pu-ji-fang          |



|                |                                                                                                                                                                                                                                                                                                                                                                                                                                                                                                                                                |                                                               |                         |
|----------------|------------------------------------------------------------------------------------------------------------------------------------------------------------------------------------------------------------------------------------------------------------------------------------------------------------------------------------------------------------------------------------------------------------------------------------------------------------------------------------------------------------------------------------------------|---------------------------------------------------------------|-------------------------|
| Dahuang San    | <i>Rhei radix et rhizoma</i> (Danggui), <i>Natrii sulfas</i> (Mangxiao), <i>Achyranthis bidentatae radix</i> (Niuxi), <i>Angelicae sinensis radix</i> (Danggui), <i>Persicae semen</i> (Taoren), <i>Tabanus</i> (Mengchong), <i>Paeoniae radix rubra</i> (Chishao), <b>Hirudo</b> (Shuizhi), <i>Trichosanthes cucumeroides radix</i> (Tuguagen), <i>Toxicodendri resina</i> (Ganqi), <i>Cinnamomi cortex</i> (Rougui)                                                                                                                          | Regulating menstrual function for pain relief                 | Tai-ping-sheng-hui-Fang |
| Daimao San     | <i>Hawksbill</i> (Daimao), <i>Corydalis yanhusuo</i> (yanhusuo), <i>Angelicae sinensis radix</i> (Danggui), <i>Scales carps</i> (Chilinjia), <i>Moschus</i> (Shexiang), <i>Succinum</i> (Hupo), <b>Hirudo</b> (Shuizhi), <i>Moutan cortex</i> (Mudanpi), <i>Typhae pollen</i> (Puhuang), <i>Leonuri herba fructus</i> (Yimucaozi)                                                                                                                                                                                                              | Promoting blood circulation and regulating menstrual function | Tai-ping-sheng-hui-Fang |
| Chilonglin San | <i>Scales carps</i> (Chililin), <i>Tabanus</i> (Mengchong), <b>Hirudo</b> (Shuizhi), <i>Typhae pollen</i> (Puhuang), <i>Crinis carbonisatus</i> (Xueyutan)                                                                                                                                                                                                                                                                                                                                                                                     | Promoting blood circulation for removing stasis               | Tai-ping-sheng-hui-Fang |
| Dilong San     | <i>Pheretima</i> (Dilong), <i>Lizards</i> (Xiyi), <i>Chuanxiong rhizoma</i> (Chuanxiong), <i>Cinnamomi cortex</i> (Rougui), <i>Zingiberis rhizoma</i> (Ganjiang), <i>Sappan lignum</i> (Sumu), <i>Aucklandiae radix</i> (Muxiang), <i>Typhae pollen</i> (Puhuang), <i>Paeoniae radix rubra</i> (Chishao), <i>Moutan cortex</i> (Mudanpi), <b>Hirudo</b> (Shuizhi), <i>Persicae semen</i> (Taoren)                                                                                                                                              | Removing stasis for pain relief                               | Tai-ping-sheng-hui-Fang |
| Guijian San    | <i>Euonymus alatus ramulus</i> (Guijianyu), <i>Paeoniae radix rubra</i> (Chishao), <i>Rhei radix et rhizoma</i> (Dahuang), <i>Cinnamomi cortex</i> (Rougui), <i>Trionycis carapax</i> (Biejia), <i>Angelicae sinensis radix</i> (Danggui), <i>Achyranthis bidentatae radix</i> (Niuxi), <i>Succinum</i> (Hupo), <i>Trichosanthes cucumeroides radix</i> (Tuguagen), <b>Hirudo</b> (Shuizhi), <i>Natrii sulfas</i> (Mangxiao), <i>Polygoni cuspidati rhizoma et radix</i> (Huzhang), <i>Persicae semen</i> (Taoren), <i>Tabanus</i> (Mengchong) | Promoting blood circulation and regulating menstrual function | Tai-ping-sheng-hui-Fang |
| Guixin San     | <i>Cinnamomi cortex</i> (Rougui), <b>Hirudo</b> (Shuizhi), <i>Moutan cortex</i> (Mudanpi), <i>Corydalis yanhusuo</i> (Yanhusuo), <i>Sulfur</i> (Liuhuang)                                                                                                                                                                                                                                                                                                                                                                                      | Treating postpartum blood stasis                              | Tai-ping-sheng-hui-Fang |
| Hupo San       | <i>Succinum</i> (Hupo), <i>Achyranthis bidentatae radix</i> (Niuxi), <i>Angelicae sinensis radix</i> (Danggui), <i>Corydalis yanhusuo</i> (Yanhusuo), <i>Persicae semen</i> (Taoren), <i>Chuanxiong rhizoma</i>                                                                                                                                                                                                                                                                                                                                | Regulating menstrual function for                             | Tai-ping-sheng-hui-Fang |

|                |                                                                                                                                                                                                                                                                                                                                                                                                                                                                                                                                                                                                                                                                                                                                                                                                                                                                                                                                                                                                                         |                                                                                 |                         |
|----------------|-------------------------------------------------------------------------------------------------------------------------------------------------------------------------------------------------------------------------------------------------------------------------------------------------------------------------------------------------------------------------------------------------------------------------------------------------------------------------------------------------------------------------------------------------------------------------------------------------------------------------------------------------------------------------------------------------------------------------------------------------------------------------------------------------------------------------------------------------------------------------------------------------------------------------------------------------------------------------------------------------------------------------|---------------------------------------------------------------------------------|-------------------------|
|                | (Chuanxiong), <i>Paeoniae radix rubra</i> (Chishao), <i>Cinnamomi cortex</i> (Rougui), <i>Rhei radix et rhizoma</i> (Dahuang), <i>Moutan cortex</i> (Mudanpi), <b>Hirudo</b> (Shuizhi)                                                                                                                                                                                                                                                                                                                                                                                                                                                                                                                                                                                                                                                                                                                                                                                                                                  | pain relief                                                                     |                         |
| Huangqin San   | <i>Scutellariae radix</i> (Huangqin), <i>Moutan cortex</i> (Mudanpi), <i>Dianthi herba</i> (Qumai), <i>Paeoniae radix rubra</i> (Chishao), <i>Persicae semen</i> (Taoren), <i>Aurantii fructus immaturus</i> (Zhishi), <i>Chuanxiong rhizoma</i> (Chuanxiong), <i>Belamcandae rhizoma</i> (Shegan), <i>Sargassum</i> (Haizao), <i>Tabanus</i> (Mengchong), <b>Hirudo</b> (Shuizhi), <i>Holotrichiadiomphalia bates</i> (Qicao), <i>Rhei radix et rhizoma</i> (Dahuang)                                                                                                                                                                                                                                                                                                                                                                                                                                                                                                                                                  | Promoting blood circulation and nourishing blood, simulating menstrual function | Tai-ping-sheng-hui-Fang |
| Jianghuang San | <i>Curcumae longae rhizoma</i> (Jianghuang), <i>Moutan cortex</i> (Mudanpi), <i>Angelicae sinensis radix</i> (Danggui), <i>Tabanus</i> (Mengchong), <i>Myrrha</i> (Moyao), <b>Hirudo</b> (Shuizhi), <i>Artemisia anomala</i> (Liujiu), <i>Cinnamomi cortex</i> (Rougui), <i>Achyranthis bidentatae radix</i> (Niuxi)                                                                                                                                                                                                                                                                                                                                                                                                                                                                                                                                                                                                                                                                                                    | Treating postpartum blood stasis, and pain                                      | Tai-ping-sheng-hui-Fang |
| Jiegu san      | <i>Scolopendra</i> (Wugong), <i>Pyritum</i> (Zirantong), <i>Olibanum</i> (Ruxiang), <i>Hydrocotylesibthorpioidesvar</i> (Tongqian), <b>Hirudo</b> (Shuizhi), <i>Myrrha</i> (Moyao)                                                                                                                                                                                                                                                                                                                                                                                                                                                                                                                                                                                                                                                                                                                                                                                                                                      | Treating traumatic injury, swelling                                             | Ru-men-shi-qin          |
| Jiujiang San   | <i>Angelicae sinensis radix</i> (Danggui), <i>Photinia serrulata</i> (Shinan), <i>Gentiana macrophyllae radix</i> (Qinjiao), <i>Spider</i> (Zhizhu), <i>Chrysanthemi flos</i> (Juhua), <i>zingiberis rhizoma</i> (Ganjiang), <i>Saposhnikoviae radix</i> (Fangfeng), <i>Moschus</i> (Shexiang), <i>Realgar</i> (Xionghuang), <i>Cinnabaris</i> (Zhusha), <i>Mylabris</i> (Banmao), <i>Zanthoxylum bungeanum pericarpium</i> (Huajiao), <i>Forsythiae fructus</i> (Lianqiao), <i>Anemarrhenae rhizoma</i> (Zhimu), <i>Euonymus alatus ramulus</i> (Guijianyu), <i>Aconiti lateralis radix praeparata</i> (Fuzi), <i>Vaccariae semen</i> (Wangbuliuxing), <i>Ginseng radix et rhizoma</i> (Renshen), <i>Podophyllum peltatum</i> (Guijiu), <i>Stephaniae tetrandrae radix</i> (Fangji), <i>Dendrobii caulis</i> (Shihu), <i>Aconiti radix</i> (Chuanwu), <i>Angelicae pubescentis radix</i> (Duhuo), <i>Elephantopus scaber</i> (Didan), <i>Tabanus</i> (Mengchong), <i>Scolopendra</i> (Wugong), <b>Hirudo</b> (Shuizhi) | Treating leucoderma                                                             | Qian-jin-yi-fang        |
| Longlin San    | <i>Carp skin</i> (Liyupi), <i>Crinis carbonisatus</i> (Xueyutan), <i>Eupolyphaga seu steleophaga</i>                                                                                                                                                                                                                                                                                                                                                                                                                                                                                                                                                                                                                                                                                                                                                                                                                                                                                                                    | Clearing heat, cooling blood,                                                   | Ji-feng-pu-ji-fang      |

|                    |                                                                                                                                                                                                                                                                                                                                                                                                                                                                                               |                                                                   |                           |
|--------------------|-----------------------------------------------------------------------------------------------------------------------------------------------------------------------------------------------------------------------------------------------------------------------------------------------------------------------------------------------------------------------------------------------------------------------------------------------------------------------------------------------|-------------------------------------------------------------------|---------------------------|
|                    | (Tubiechong), <b>Hirudo</b> (Shuizhi), <i>Squama manitis</i> (Chuanshanjia), <i>Gleditsiae abnormalis fructus</i> (Zhuyazaojiao), <i>Typhae pollen</i> (Puhuang), <i>Draconis sanguis</i> (Xuejie), <i>Myrrha</i> (Moyao), <i>Moschus</i> (Shexiang), <i>Succinum</i> (Hupo)                                                                                                                                                                                                                  | promoting blood circulation for removing stasis                   |                           |
| Mudan San          | <i>Moutan cortex</i> (Mudanpi), <i>Angelicae sinensis radix</i> (Danggui), <i>Angelicae dahuricae radix</i> (Baizhi), <i>Succinum</i> (Hupo), <i>Rhei radix et rhizoma</i> (Dahuang), <i>Paeoniae radix rubra</i> (Chishao), <i>Cinnamomi cortex</i> (Rougui), <i>Chuanxiong rhizoma</i> (Chuanxiong), <i>Tabanus</i> (Mengchong), <b>Hirudo</b> (Shuizhi)                                                                                                                                    | Regulating the menstrual function                                 | Tai-ping-sheng-hui-Fang   |
| Poxue San          | <i>Notopterygii rhizoma et radix</i> (Qianghuo), <i>Saposhnikoviae radix</i> (Fangfeng), <i>Cinnamomi cortex</i> (Rougui), <i>Bupleuri radix</i> (Chaihu), <i>Angelicae sinensis radix</i> (Danggui), <b>Hirudo</b> (Shuizhi), <i>Moschus</i> (Shexiang), <i>Sappan lignum</i> (Sumu)                                                                                                                                                                                                         | Promoting blood circulation, dispelling stasis, pain relief       | Yu-ji-wei-yi              |
| Rougui San         | <i>Cinnamomi cortex</i> (Rougui), <i>Angelicae sinensis radix</i> (Danggui), <i>Typhae pollen</i> (Puhuang), <i>Achyranthis bidentatae radix</i> (Niuxi), <i>Euonymus alatus ramulus</i> (Guijianyu), <i>Tabanus</i> (Mengchong), <i>Succinum</i> (Hupo), <i>Paeoniae radix rubra</i> (Chishao), <i>Persicae semen</i> (Taoren), <b>Hirudo</b> (Shuizhi), <i>Rhei radix et rhizoma</i> (Dahuang)                                                                                              | Stopping bleeding, promoting blood circulation, dispelling stasis | Tai-ping-sheng-hui-Fang   |
| Shenxiao Jiegu San | <b>Hirudo</b> (Shuizhi), <i>Os tigris</i> (Hugu), <i>Testudinis carapax et plastrum</i> (Guijia), <i>Pyritum</i> (Zirantong), <i>Momordicae semen</i> (Mubiezi), <i>Pharbitidis semen</i> (Heiqianniu), <i>Tetrapanacis medulla</i> (Tongcao), <i>Olibanum</i> (Ruxiang), <i>Myrrha</i> (Moyao), <i>Vignae semen</i> (Chixiaodou), <i>Angelicae sinensis radix</i> (Danggui), <i>Saposhnikoviae radix</i> (Fangfeng), <i>Linderae radix</i> (Wuyao), <i>Aconiti kusnezoffii radix</i> (Caowu) | Promoting blood circulation, activating Qi, relieving pain        | Feng-ke-ji-yan-ming-fan g |
| Shuizhi San        | <b>Hirudo</b> (Shuizhi), <i>Tabanus</i> (Mengchong), <i>Achyranthis bidentatae radix</i> (Niuxi), <i>Moutan cortex</i> (Mudanpi), <i>Persicae semen</i> (Taoren), <i>Cinnamomi cortex</i> (Mudanpi), <i>Artemisia keiskeana fructus</i> (Anzi), <i>Angelicae sinensis radix</i> (Danggui), <i>Trionycis carapax</i> (Biejia), <i>Toxicodendri resina</i> (Ganqi), <i>Euonymus alatus ramulus</i> (Guijianyu), <i>Succinum</i> (Hupo),                                                         | Promoting blood circulation, eliminating stasis, relieving pain   | Tai-ping-sheng-hui-Fang   |

|                |                                                                                                                                                                                                                                                                                                                                                                                                                                                                                                                                                 |                                                                                              |                         |
|----------------|-------------------------------------------------------------------------------------------------------------------------------------------------------------------------------------------------------------------------------------------------------------------------------------------------------------------------------------------------------------------------------------------------------------------------------------------------------------------------------------------------------------------------------------------------|----------------------------------------------------------------------------------------------|-------------------------|
|                | <i>Euodiae fructus</i> (Wuzhuyu), <i>Genkwa flos</i> (Yuanhua), <i>Moschus</i> (Shexiang)                                                                                                                                                                                                                                                                                                                                                                                                                                                       |                                                                                              |                         |
| Taoren San     | <i>Persicae semen</i> (Taoren), <i>Rhei radix et rhizoma</i> (Dahuang), <i>Tabanus</i> (Mengchong), <b>Hirudo</b> (Shuizhi), <i>Natrii sulfas</i> (Mangxiao), <i>Cinnamomi cortex</i> (Rougui), <i>Angelicae sinensis radix</i> (Danggui), <i>Glycyrrhizae radix et rhizoma</i> (Gancao)                                                                                                                                                                                                                                                        | Promoting blood circulation, eliminating stasis                                              | Tai-ping-sheng-hui-Fang |
| Wujin San      | <i>Carp skin carbonisatus</i> (Chililintan), <i>Crinis carbonisatus</i> (Xueyutan), <i>Terra flava usta</i> (Fulonggan), <i>Porcinefat</i> (Layuezhuzhi), <b>Hirudo</b> (Shuizhi), <i>Cinnamomi cortex</i> (Rougui), <i>Angelicae sinensis radix</i> (Danggui), <i>Moschus</i> (Shexiang)                                                                                                                                                                                                                                                       | Warming spleen and stomach for removing stasis                                               | Tai-ping-sheng-hui-Fang |
| Xingren San    | <i>Armeniacae semen amarum</i> (Kuxingren), <i>Rhei radix et rhizoma</i> (Dahuang), <b>Hirudo</b> (Shuizhi), <i>Tabanus</i> (Mengchong), <i>Persicae semen</i> (Taoren)                                                                                                                                                                                                                                                                                                                                                                         | Treating irregular menses                                                                    | Tai-ping-sheng-hui-Fang |
| Xionghuang San | <i>Realgar</i> (Xionghuang), <i>Halite violaceous</i> (Naosha), <i>Moschus</i> (Shexiang), <i>Felursi</i> (Xiongdan), <b>Hirudo</b> (Shuizhi)                                                                                                                                                                                                                                                                                                                                                                                                   | Eliminating stasis, relieving pain                                                           | Tai-ping-sheng-hui-Fang |
| Xuejie San     | <i>Halite violaceous</i> (Naosha), <i>Draconis sanguis</i> (Xuejie), <i>Myrrha</i> (Moyao), <i>Cinnamomi cortex</i> (Rougui), <i>Aucklandiae radix</i> (Muxiang), <i>Cinnabaris</i> (Zhusha), <i>Hippocampus</i> (Haima), <i>Toxicodendri resina</i> (Ganqi), <i>Tabanus</i> (Mengchong), <i>Borneolum syntheticum</i> (Bingpian), <b>Hirudo</b> (Shuizhi), <i>Angelicae sinensis radix</i> (Danggui), <i>Borax</i> (Pengsha), <i>Ferulae resina</i> (Awei)                                                                                     | Clearing heat to stop bleeding, thirst relief                                                | Ji-feng-pu-ji-fang      |
| Yimucaozi San  | <i>Leonuri herba fructus</i> (Yimucaozi), <i>Cinnamomi cortex</i> (Rougui), <i>Angelicae sinensis radix</i> (Danggui), <i>Paeoniae radix rubra</i> (Chishao), <i>Rehmanniae radix praeparata</i> (Shudihuang), <i>Hordei fructus Germinatus</i> (Maiya), <i>Euonymus alatus ramulus</i> (Guijianyu), <i>Rhei radix et rhizoma</i> (Dahuang), <i>Carp skin carbonisatus</i> (Chililintan), <i>Crinis carbonisatus</i> (Xueyutan), <i>Lithargyrum</i> (Mituoseng), <i>Tabanus</i> (Mengchong), <b>Hirudo</b> (Shuizhi), <i>Moschus</i> (Shexiang) | Promoting blood circulation, simulating menstrual function, nourishing blood for pain relief | Tai-ping-sheng-hui-Fang |
| Yuanhua San    | <i>Genkwa flos</i> (Yuanhua), <i>Aconiti radix</i> (Chuanxiong), <i>Euonymus alatus ramulus</i> (Guijianyu), <i>Tabanus</i> (Mengchong), <b>Hirudo</b> (Shuizhi), <i>Persicae semen</i> (Taoren)                                                                                                                                                                                                                                                                                                                                                | Eliminating stasis, relieving pain                                                           | Tai-ping-sheng-hui-Fang |

|              |                                                                                                                                                                                                                                                                                                                                                                                                                                                                                                                                                                                                                                                                                                                                                                                                                                                                                                                                                                                                                                                                                                                                                                                                                                                                                                                                                                                                           |                                                                                                                                         |                         |
|--------------|-----------------------------------------------------------------------------------------------------------------------------------------------------------------------------------------------------------------------------------------------------------------------------------------------------------------------------------------------------------------------------------------------------------------------------------------------------------------------------------------------------------------------------------------------------------------------------------------------------------------------------------------------------------------------------------------------------------------------------------------------------------------------------------------------------------------------------------------------------------------------------------------------------------------------------------------------------------------------------------------------------------------------------------------------------------------------------------------------------------------------------------------------------------------------------------------------------------------------------------------------------------------------------------------------------------------------------------------------------------------------------------------------------------|-----------------------------------------------------------------------------------------------------------------------------------------|-------------------------|
| Yuntaizi San | <i>Yuntaizi</i> , <i>Rhei radix et rhizoma</i> (Dahuang), <i>Myrrha</i> (Moyao), <i>Typhae pollen</i> (Puhuang), <b><i>Hirudo</i></b> (Shuizhi), <i>Calomelas</i> (Qingfen), <i>Rehmanniae radix</i> (Dihuang), ginger juice                                                                                                                                                                                                                                                                                                                                                                                                                                                                                                                                                                                                                                                                                                                                                                                                                                                                                                                                                                                                                                                                                                                                                                              | Promoting blood and eliminating stasis, dispelling tumefaction                                                                          | Tai-ping-sheng-hui-Fang |
| Guixin Jiu   | <i>Cinnamomi cortex</i> (Rougui), <i>Moutan cortex</i> (Mudanpi), <i>Paeoniae radix alba</i> (Baishao), <i>Achyranthis bidentatae radix</i> (Niuxi), <i>Toxicodendri resina</i> (Ganqi), <i>Trichosanthes cucumeroides radix</i> (Tuguagen), <i>Euodiae fructus</i> (Wuzhuyu), <i>Rhei radix et rhizoma</i> (Dahuang), <i>Scutellariae radix</i> (Huangqin), <i>Zingiberis rhizoma</i> (Ganjiang), <i>Tabanus</i> (Mengchong), <i>Eupolyphaga seu steleophaga</i> (Tubiechong), <i>Holotrichiadiomphalia bates</i> (Qicao), <b><i>Hirudo</i></b> (Shuizhi), <i>Crinis carbonisatus</i> (Xueyutan), <i>Asari radix et rhizoma</i> (Xixin), <i>Bombyx batryticatus</i> (Jiangchan), <i>Cannabis fructus</i> (Huomaren), <i>Rehmanniae radix</i> (Dihuang), <i>Polygoni cuspidati rhizoma et radix</i> (Huzhang), <i>Trionycis carapax</i> (Biejia), <i>Artemisia keiskeana fructus</i> (Anzi)                                                                                                                                                                                                                                                                                                                                                                                                                                                                                                               | Eliminating blood stasis and simulating menstrual function                                                                              | Qian-jin-yao-fang       |
| Huazheng Dan | <i>Ginseng radix et rhizoma</i> (Renshen), <i>Cinnamomi cortex</i> (Rougui), <i>Anemones raddeanae rhizoma</i> (Liangtoujian), <b><i>Hirudo</i></b> (Shuizhi), <i>Wenyujin rhizoma concisum</i> (Pianjianghuang), <i>Eugenia caryophyllata</i> Thunb (Gongdingxiang), <i>Zanthoxylum bungeanum carbonisatus</i> (Huajiaotan), <i>Tabanus</i> (Mengchong), <i>Sparganii rhizoma</i> (Sanleng), <i>Typhae pollen</i> (Puhuangtan), <i>Moschus</i> (Shexiang), <i>Sappan lignum</i> (Sumu), <i>Persicae semen</i> (Taoren), <i>Perillae fructus</i> (processed, Suzishuang), <i>Faeces trogopteroi</i> (Wulingzhi), <i>Dalbergiae odoriferae lignum</i> (Jiangxiang), <i>Toxicodendri resina</i> (Ganqi), <i>Myrrha</i> (Moyao), <i>Paeoniae radix alba</i> (Baishao), <i>Armeniacae semen amarum</i> (Kuxingren), <i>Cyperis rhizoma</i> (Xiangfu), <i>Euodiae fructus</i> (Wuzhuyu), <i>Corydalis yanhusuo</i> (Yanhusuo), <i>Angelicae sinensis radix</i> (Danggui), <i>Ferulae resina</i> (Awei), <i>Foeniculi fructus carbonisatus</i> (Xiaohuixiangtan), <i>Chuanxiong rhizoma</i> (Chuanxiong), <i>Olibanum</i> (ruxiang), <i>Alpiniae officinarum rhizoma</i> (Gaoliangjiang), <i>Artemisiae argyi carbonisatus</i> (Aitan), <i>Leonurus liquid extract</i> (Yimucaogao), <i>Rehmanniae radix praeparata</i> (Shudihuang), <i>Trionycis carapax</i> (Biejia), <i>Rhei radix et rhizoma</i> (Dahuang) | Nourishing blood and activating blood, eliminating blood stasis and simulating menstrual function, relieving pain and treating furuncle | Lin-zheng-jing-yan-lu   |

|                          |                                                                                                                                                                                                                                                                                                                                                                                                                                                                                                                                                                                                                                                                                                                                                                                                                                                                                                                                                                                                                                                                                                                                                                                                                                                                                                                                                                                                                                              |                                                                                                                                         |                    |
|--------------------------|----------------------------------------------------------------------------------------------------------------------------------------------------------------------------------------------------------------------------------------------------------------------------------------------------------------------------------------------------------------------------------------------------------------------------------------------------------------------------------------------------------------------------------------------------------------------------------------------------------------------------------------------------------------------------------------------------------------------------------------------------------------------------------------------------------------------------------------------------------------------------------------------------------------------------------------------------------------------------------------------------------------------------------------------------------------------------------------------------------------------------------------------------------------------------------------------------------------------------------------------------------------------------------------------------------------------------------------------------------------------------------------------------------------------------------------------|-----------------------------------------------------------------------------------------------------------------------------------------|--------------------|
| Huazheng<br>Huisheng Dan | <p><i>Trionycis carapax</i> (Biejia), <i>Ginseng radix et rhizoma</i> (Renshen), <i>Persicae semen</i> (Taoren),<br/> <i>Leonurus liquid extract</i> (Yimugao), <i>Rehmanniae radix praeparata</i> (Shudihuang), <i>Carthami flos</i> (Honghua), <i>Eugenia caryophyllata</i> Thunb (Gongdingxiang), <i>Paeoniae radix alba</i> (Baishao), <i>Moschus</i> (Shexiang), <i>Foeniculi fructus carbonisatus</i> (Xiaohuixiangtan), <i>Angelicae sinensis radix</i> (Danggui), <i>Toxicodendri resina</i> (Ganqi), <i>Faeces trogopteroni</i> (Wulingzhi), <i>Armeniacae semen amarum</i> (Kuxingren), <i>Chuanxiong rhizoma</i> (Chuanxiong), <i>Sparganii rhizoma</i> (Sanleng), <i>Sappan lignum</i> (Sumu), <i>Cyperus rhizoma</i> (Xiangfu), <i>Perillae fructus</i> (processed, Suzishuang), <i>Cinnamomi cortex</i> (Rougui), <i>Ferulae resina</i> (Awei), <i>Corydalis yanhusuo</i> (Yanhusuo), <i>Dalbergiae odoriferae lignum</i> (Jiangxiang), <i>Artemisiae argyi carbonisatus</i> (Aitan), <i>Wenyujin rhizoma concisum</i> (Pianjianghuang), <i>Euodiae fructus</i> (Wuzhuyu), <i>Alpiniae officinarum rhizoma</i> (Gaoliangjiang), <i>Anemones raddeanae rhizoma</i> (Liangtoujian), <i>Olibanum</i> (Ruxiang), <b>Hirudo</b> (Shuizhi), <i>Zanthoxylum bungeanum carbonisatus</i> (Huajiaotan), <i>Myrrha</i> (Moyao), <i>Tabanus</i> (Mengchong), <i>Typhae pollen</i> (Puhuangtan), <i>Rhei radix et rhizoma</i> (Dahuang)</p> | Nourishing blood and activating blood, eliminating blood stasis and simulating menstrual function, relieving pain and treating furuncle | Wu-ju-tong-yi-an   |
| Yangyin Gao              | <p><i>Rehmanniae radix</i> (Dihuang), <i>Angelicae sinensis radix</i> (Danggui), <i>Paeoniae radix rubra</i> (Chishao), <i>Achyranthis bidentatae radix</i> (Niuxi), <i>Linderae radix</i> (Wuyao), <i>Moutan cortex</i> (Mudanpi), <i>Poria</i> (Fuling), <i>Carthami flos</i> (Honghua), <b>Hirudo</b> (Shuizhi)</p>                                                                                                                                                                                                                                                                                                                                                                                                                                                                                                                                                                                                                                                                                                                                                                                                                                                                                                                                                                                                                                                                                                                       | Activating blood and nourishing blood, simulating menstrual function                                                                    | Ji-feng-pu-ji-fang |

Table S2 The patented drugs containing Shuizhi and their clinical uses (222 Drug approval number)

| Preparation name                                                            | Main compositions                                                                     | Clinical uses                                                   | References |
|-----------------------------------------------------------------------------|---------------------------------------------------------------------------------------|-----------------------------------------------------------------|------------|
| Naoxuekang Pill, Tablet,<br>Oral Liquid, Granule,<br>Capsule, dripping Pill | <b><i>Hirudo</i></b> (Shuizhi)                                                        | Stroke and intracerebral<br>hemorrhage                          | [5]        |
| Huoxue Tongmai Capsule                                                      | <b><i>Hirudo</i></b> (Shuizhi)                                                        | Amenorrhea with syndrome<br>of blood stasis and<br>hyperlipemia | [5]        |
| Compound Maqitong<br>Capsule                                                | <b><i>Hirudo</i></b> (Shuizhi), <i>Eupolyphaga</i> or <i>Steleophaga</i> (Tubeichong) | Stable coronary disease and<br>angina                           | [5]        |

|                                             |                                                                                                                                                                                                       |                                                                           |     |
|---------------------------------------------|-------------------------------------------------------------------------------------------------------------------------------------------------------------------------------------------------------|---------------------------------------------------------------------------|-----|
| Zhongfeng'an Oral Liquid                    | <b>Hirudo</b> (Shuizhi), <i>Astragali Radix</i> (Huangqi)                                                                                                                                             | Acute cerebral thrombosis with syndrome of Qi deficiency and blood stasis | [5] |
| Shuxuetong Injection                        | <b>Hirudo</b> (Shuizhi), <i>Pheretima</i> (Dilong)                                                                                                                                                    | Acute stroke with blood stasis                                            | [5] |
| Shenyuan Capsule                            | <i>Leonuri Herba</i> (Yimucao), <i>Polygala Herba</i> (Guazijin), <b>Hirudo</b> (Shuizhi)                                                                                                             | Edema induced by blood stasis and chronic nephritis                       | [5] |
| Zhuyu Tongmai Capsule                       | <b>Hirudo</b> (Shuizhi), <i>Persicae semen</i> (Taoren), <i>Tabanus</i> (Mengchong), <i>Rhei radix et rhizoma</i> (Dahuang)                                                                           | Vertigo with blood stasis                                                 | [5] |
| Naosai'an Capsule                           | <b>Hirudo</b> (Shuizhi), <i>Tabanus</i> (Mengchong), <i>Rhei radix et rhizoma</i> (Dahuang), <i>Persicae semen</i> (Taoren)                                                                           | Thrombotic cerebral embolism recovery stage                               | [5] |
| Wuwei Tongshuan Oral Liquid                 | <i>Astragali Radix</i> (Huangqi), <b>Hirudo</b> (Shuizhi), <i>Chuanxiong Rhizoma</i> (Chuanxiong), <i>Angelicae sinensis radix</i> (Danggui), <i>Salviae miltiorrhizae radix et rhizoma</i> (Danshen) | Acute cerebral infarction                                                 | [5] |
| Compound Danzhi Tablet                      | <i>Astragali Radix</i> (Huangqi), <i>Salviae miltiorrhizae radix et rhizoma</i> (Danshen), <b>Hirudo</b> (Shuizhi), <i>Pheretima</i> (Dilong), <i>Chuanxiong Rhizoma</i> (Chuanxiong)                 | Cerebral infarction recovery stage                                        | [5] |
| Lyophilized Naoxinkang powder for injection | <i>Ginseng Radix et Rhizoma</i> (Renshen), <i>Astragali Radix</i> (Huangqi), <i>Ganoderma</i> (Lingzhi), <b>Hirudo</b> (Shuizhi)                                                                      | Cerebral infarction, early coronary disease and angina                    | [5] |
| Qizhi Jiangtang Capsule                     | <i>Astragali Radix</i> (Huangqi), <i>Rehmanniae Radix</i> (Dihuang), <i>Polygonati Rhizoma</i> (Huangjing), <b>Hirudo</b> (Shuizhi)                                                                   | Type II diabetes and related complications                                | [5] |
| Huisheng Oral Liquid                        | <i>Leonuri Herba</i> (Yimucao), <i>Carthami Flos</i> (Honghua), <i>Zanthoxylum bungeanum carbonisatus</i> (Huajiao Tan), <b>Hirudo</b> (Shuizhi, processed), <i>Angelicae sinensis radix</i>          | For the treatment of the primary liver carcinoma and                      | [5] |



|                           |                                                                                                                                                                                                                                                                                                                                                                                                                                                                                                                                                                                                                                                                                                                                                                                                                                                                                                                                                                                                                                                                                                                                                                                                                                                                                                                                                                                                                                     |                                                                                                              |     |
|---------------------------|-------------------------------------------------------------------------------------------------------------------------------------------------------------------------------------------------------------------------------------------------------------------------------------------------------------------------------------------------------------------------------------------------------------------------------------------------------------------------------------------------------------------------------------------------------------------------------------------------------------------------------------------------------------------------------------------------------------------------------------------------------------------------------------------------------------------------------------------------------------------------------------------------------------------------------------------------------------------------------------------------------------------------------------------------------------------------------------------------------------------------------------------------------------------------------------------------------------------------------------------------------------------------------------------------------------------------------------------------------------------------------------------------------------------------------------|--------------------------------------------------------------------------------------------------------------|-----|
|                           | (Danggui), <i>Sappan lignum</i> (Sumu), <i>Sparganii rhizoma</i> (Sanleng, processed with vinegar), <i>Anemones Raddeanae Rhizoma</i> (Liangtoujian), <i>Chuanxiong rhizoma</i> (Chuanxiong), <i>Dalbergiae odoriferae lignum</i> (Jiangxiang), <i>Cyperii rhizoma</i> (Xiangfu, processed with vinegar), <i>Ginseng Radix et Rhizoma</i> (Renshen), <i>Alpiniae officinarum rhizoma</i> (Gaoliangjiang), <i>Curcumae longae rhizoma</i> (Jianghuang), <i>Myrrha</i> (Moyao, processed with vinegar), <i>Armeniacae semen amarum</i> (Kuxingren, fried), <i>Rhei radix et rhizoma</i> (Dahuang), <i>Perillae Fructus</i> (Zisuzi), <i>Foeniculi Fructus</i> (Xiaohuixiang, fried with salt), <i>Persicae semen</i> (Taoren), <i>Faeces Trogopteroni</i> (Wulingzhi, processed with vinegar), <i>Tabanus</i> (Mengchong), <i>Trionycis carapax</i> (Biejia), <i>Caryophylli flos</i> (Dingxiang), <i>Corydalis Yanhusuo</i> (Yanhusuo, processed with vinegar), <i>Paeoniae radix alba</i> (Baishao), <i>Typhae pollen carbonisatus</i> (Puhuang Tan), <i>Olibanum</i> (Ruxiang, processed with vinegar), <i>Toxicodendri resina</i> (Ganqi, calcined), <i>Euodiae fructus</i> (Wuzhuyu, processed with aqueous extract of <i>Glycyrrhizae Radix et Rhizoma</i> ), <i>Ferulae resina</i> (Awei), <i>Cinnamomi cortex</i> (Rougui), <i>Artemisiae argyi folium</i> (Aiye, processed), <i>Rehmanniae radix praeparata</i> (Shudihuang) | lung carcinoma                                                                                               |     |
| Tongmai Jiangtang Capsule | <i>Pseudostellariae radix</i> (Taizishen), <i>Salviae miltiorrhizae radix et rhizome</i> (Danshen), <i>Coptidis rhizoma</i> (Huanglian), <i>Astragali radix</i> (Huangqi), <i>Gynostemma pentaphyllum</i> (Jiaogulan), <i>Dioscoreae rhizome</i> (Shanyao), <i>Atractylodis rhizome</i> (Cangzhu), <i>Scrophulariae radix</i> (Xuanshen), <b>Hirudo</b> (Shuizhi), <i>Malvae fructus</i> (Dongkuiguo), <i>Puerariae lobatae radix</i> (Gegen)                                                                                                                                                                                                                                                                                                                                                                                                                                                                                                                                                                                                                                                                                                                                                                                                                                                                                                                                                                                       | Replenishing Yin, clearing heat and promoting blood circulation. For the treatment of diabetes               | [5] |
| Jiangtang Tongmai Capsule | <i>Pseudostellariae radix</i> (Taizishen), <i>Astragali radix</i> (Huangqi), <i>Polygonati rhizoma</i> (Huangjing), <i>Asparagi radix</i> (Tiandong), <i>Ophiopogonis radix</i> (Maidong), <i>Scrophulariae radix</i> (Xuanshen), <i>Trichosanthis Radix</i> (Tianhuafen), <i>Atractylodis rhizome</i> (Cangzhu), <i>Anemarrhenae rhizome</i> (Zhimu), <i>Puerariae lobatae radix</i> (Gegen), <i>Coptidis rhizome</i> (Huanglian), <i>Salviae miltiorrhizae radix et rhizome</i> (Danshen), <i>Leonuri Herba</i>                                                                                                                                                                                                                                                                                                                                                                                                                                                                                                                                                                                                                                                                                                                                                                                                                                                                                                                   | Tonifying Qi and Yin, promoting blood circulation and removing stasis. For the treatment of type II diabetes | [5] |

|                              |                                                                                                                                                                                                                                                                                                                                                                                                                                                                                                                                                                                         |                                                     |     |
|------------------------------|-----------------------------------------------------------------------------------------------------------------------------------------------------------------------------------------------------------------------------------------------------------------------------------------------------------------------------------------------------------------------------------------------------------------------------------------------------------------------------------------------------------------------------------------------------------------------------------------|-----------------------------------------------------|-----|
|                              | (Yimucao), <i>Paeoniae radix rubra</i> (Chishao), <b>Hirudo</b> (Shuizhi), <i>Cyathulae radix</i> (Chuanniuxi), <i>Spatholobi caulis</i> (Jixueteng), <i>Clematidis radix et rhizoma</i> (Weilingxian), <i>Litchi semen</i> (Lizhihe), <i>Pheretima</i> (Dilong), <i>Chuanxiong rhizome</i> (Chuanxiong)                                                                                                                                                                                                                                                                                |                                                     |     |
| Digu Jiangtang Capsule       | <i>Curcumae radix</i> (Yujin), <i>Lycii cortex</i> (Digupi), <i>Perillae Fructus</i> (Zisuzi), <i>Trionycis carapax</i> (Biejia, processed), <i>Pheretima</i> (Dilong), <b>Hirudo</b> (Shuizhi), <i>Cordyceps</i> (Dongchongxiacao)                                                                                                                                                                                                                                                                                                                                                     | Diabetes induced by Yin deficiency and blood stasis | [5] |
| Nao Xin Tong Capsule         | <i>Astragali radix</i> (Huangqi), <i>Paeoniae radix rubra</i> (Chishao), <i>Salviae miltiorrhizae radix et rhizome</i> (Danshen), <i>Angelicae sinensis radix</i> (Danggui), <i>Chuanxiong rhizome</i> (Chuanxiong), <i>Persicae semen</i> (Taoren), <i>Carthami Flos</i> (Honghua), <i>Olibanum</i> (Ruxiang, processed), Myrrha (Moyao, processed), <i>Spatholobi caulis</i> (Jixueteng), <i>Achyranthis bidentatae radix</i> (Niuxi), <i>Cinnamomi ramulus</i> (Guizhi), <i>Mori ramulus</i> (Sangzhi), <i>Pheretima</i> (Dilong), <i>Scorpio</i> (Quanxie), <b>Hirudo</b> (Shuizhi) | Stroke induced by Qi deficiency and blood stasis    | [5] |
| Naoshuan Kangfu Capsule      | <i>Notoginseng radix et rhizoma</i> (Sanqi), <i>Puerariae lobatae radix</i> (Gegen), <i>Paeoniae radix rubra</i> (Chishao), <i>Carthami Flos</i> (Honghua), <i>Siegesbeckiae herba</i> (Xixiancao), <i>Draconis Sanguis</i> (Xuejie), <i>Chuanxiong rhizome</i> (Chuanxiong), <i>Pheretima</i> (Dilong), <b>Hirudo</b> (Shuizhi), <i>Achyranthis bidentatae radix</i> (Niuxi)                                                                                                                                                                                                           | Stroke induced by blood stasis                      | [5] |
| Shexiang Xinnao Tong Capsule | <i>Salviae miltiorrhizae radix et rhizome</i> (Danshen), <i>Notoginseng radix et rhizoma</i> (Sanqi), <i>Carthami Flos</i> (Honghua), <i>Epimedii folium</i> (Yinyanghuo), <i>Puerariae lobatae radix</i> (Gegen), <i>Curcumae radix</i> (Yujin), <i>Persicae semen</i> (Taoren), <i>Chuanxiong rhizome</i> (Chuanxiong), <b>Hirudo</b> (Shuizhi), <i>Borneolum Syntheticum</i> (Bingpian), <i>Moschus</i> (Shexiang), Total ginsenoside of ginseng stems and leaves (Renshen Jingye Zongzaogan)                                                                                        | Stroke induced by blood stasis                      | [5] |

|                                |                                                                                                                                                                                                                                                                                                                                                                                                                                                                                                                                                                                                                                                                                                                                                                                                                                                                                                                                                                                                                                                                                                                                                                                                                                                                                                                                                                                                                                                                                                                                                                                                                                                                                                   |                                                                                                                                                                  |             |
|--------------------------------|---------------------------------------------------------------------------------------------------------------------------------------------------------------------------------------------------------------------------------------------------------------------------------------------------------------------------------------------------------------------------------------------------------------------------------------------------------------------------------------------------------------------------------------------------------------------------------------------------------------------------------------------------------------------------------------------------------------------------------------------------------------------------------------------------------------------------------------------------------------------------------------------------------------------------------------------------------------------------------------------------------------------------------------------------------------------------------------------------------------------------------------------------------------------------------------------------------------------------------------------------------------------------------------------------------------------------------------------------------------------------------------------------------------------------------------------------------------------------------------------------------------------------------------------------------------------------------------------------------------------------------------------------------------------------------------------------|------------------------------------------------------------------------------------------------------------------------------------------------------------------|-------------|
| Dahuang Zhechong Pill, Capsule | <i>Rhei radix et rhizoma Praeparata</i> (Shudahuang), <i>Eupolyphaga</i> or <i>Steleophaga</i> (Tubeichong, fried), <b><i>Hirudo</i></b> (Shuizhi, processed), <i>Tabanus</i> (Mengchong, fried), <i>Holotrichiadiomphalia Bates</i> (Qicao, fried), <i>Toxicodendri resina</i> (Ganqi, calcined), <i>Persicae semen</i> (Taoren), <i>Armeniacae semen amarum</i> (Kuxingren, fried), <i>Scutellariae radix</i> (Huangqin), <i>Rehmanniae radix</i> (Dihuang), <i>Paeoniae radix alba</i> (Baishao), <i>Glycyrrhizae radix et rhizoma</i> (Gancao)                                                                                                                                                                                                                                                                                                                                                                                                                                                                                                                                                                                                                                                                                                                                                                                                                                                                                                                                                                                                                                                                                                                                                | Invigorating blood, removing blood stasis. For the treatment of hepatic diseases and gynecopathy in clinic practice and occasionally for atherosclerotic therapy | [5]<br>[13] |
| Huazheng Huisheng Tablet       | <i>Leonuri Herba</i> (Yimucao), <i>Carthami Flos</i> (Honghua), <i>Zanthoxylum bungeanum carbonisatus</i> (Huajiao Tan), <b><i>Hirudo</i></b> (Shuizhi, processed), <i>Angelicae sinensis radix</i> (Danggui), <i>Sappan lignum</i> (Sumu), <i>Sparganii rhizoma</i> (Sanleng, processed with vinegar), <i>Anemones Raddeanae Rhizoma</i> (Liangtoujian), <i>Chuanxiong rhizoma</i> (Chuanxiong), <i>Dalbergiae odoriferae lignum</i> (Jiangxiang), <i>Cyperi rhizoma</i> (Xiangfu, processed with vinegar), <i>Ginseng Radix et Rhizoma</i> (Renshen), <i>Alpiniae officinarum rhizoma</i> (Gaoliangjiang), <i>Curcumae longae rhizoma</i> (Jianghuang), <i>Myrrha</i> (Moyao, processed with vinegar), <i>Armeniacae semen amarum</i> (Kuxingren, fried), <i>Rhei radix et rhizoma</i> (Dahuang), <i>Moschus artifactus</i> (Rengong Shexiang), <i>Foeniculi Fructus</i> (Xiaohuixiang, fried with salt), <i>Persicae semen</i> (Taoren), <i>Faeces Trogopteroni</i> (Wulingzhi, processed with vinegar), <i>Tabanus</i> (Mengchong), <i>Trionycis carapax</i> (Biejia), <i>Caryophylli flos</i> (Dingxiang), <i>Corydalis Yanhusuo</i> (Yanhusuo, processed with vinegar), <i>Paeoniae radix alba</i> (Baishao), <i>Typhae pollen carbonisatus</i> (Puhuang Tan), <i>Olibanum</i> (Ruxiang, processed with vinegar), <i>Toxicodendri resina</i> (Ganqi, calcined), <i>Euodiae fructus</i> (Wuzhuyu, processed with aqueous extract of <i>Glycyrrhizae Radix et Rhizoma</i> ), <i>Ferulae resina</i> (Awei), <i>Cinnamomi cortex</i> (Rougui), <i>Artemisiae argyi folium</i> (Aiye, processed with vinegar), <i>Rehmanniae radix praeparata</i> (Shudihuang), <i>Perillae Fructus</i> (Zisuzi) | For the gynecopathy diseases, primary liver cancer and lung cancer                                                                                               | [13]        |
| Xueshuan Xinmaining            | <i>Chuanxiong rhizome</i> (Chuanxiong), <i>Sophorae flos</i> (Huai hua), <i>Salviae miltiorrhizae</i>                                                                                                                                                                                                                                                                                                                                                                                                                                                                                                                                                                                                                                                                                                                                                                                                                                                                                                                                                                                                                                                                                                                                                                                                                                                                                                                                                                                                                                                                                                                                                                                             | Cerebral thrombosis,                                                                                                                                             | [13]        |

|                                          |                                                                                                                                                                                                                                                                                                                                                                                                                                                                                                                                                                                                                                                                                                                                                                                                                                                                                                                                                                                                                                                                                                                                                                                                                    |                                                                                                                       |      |
|------------------------------------------|--------------------------------------------------------------------------------------------------------------------------------------------------------------------------------------------------------------------------------------------------------------------------------------------------------------------------------------------------------------------------------------------------------------------------------------------------------------------------------------------------------------------------------------------------------------------------------------------------------------------------------------------------------------------------------------------------------------------------------------------------------------------------------------------------------------------------------------------------------------------------------------------------------------------------------------------------------------------------------------------------------------------------------------------------------------------------------------------------------------------------------------------------------------------------------------------------------------------|-----------------------------------------------------------------------------------------------------------------------|------|
| Tablet, Capsule                          | <i>radix et rhizome</i> (Danshen), <b>Hirudo</b> (Shuizhi), <i>Ilex pubescens</i> (Maodongqing), <i>Bovis calculus</i> (Niuhuang), <i>Moschus</i> (Shexiang), Total ginsenoside of ginseng stems and leaves (Renshen Jingye Zongzaogan), <i>Borneolum Syntheticum</i> (Bingpian), Toad venom (Chansu)                                                                                                                                                                                                                                                                                                                                                                                                                                                                                                                                                                                                                                                                                                                                                                                                                                                                                                              | coronary disease and angina pectoris induced by Qi-stagnancy and blood stasis                                         |      |
| Qingnao Jiangya Tablet, Capsule, Granule | <i>Scutellariae radix</i> (Huangqin), <i>Prunellae spica</i> (Xiakucao), <i>Sophorae flos</i> (Huai hua), Magnetitum (Cishi, Calcined), <i>Achyranthis bidentatae radix</i> (Niuxi), <i>Angelicae sinensis radix</i> (Danggui), <i>Rehmanniae radix</i> (Dihuang), <i>Salviae miltiorrhizae radix et rhizoma</i> (Danshen), <b>Hirudo</b> (Shuizhi), <i>Uncariae ramulus cum unicis</i> (Gouteng), <i>Cassiae semen</i> (Juemingzi), <i>Pheretima</i> (Dilong), <i>Margaritifera concha</i> (Zhenzhumu)                                                                                                                                                                                                                                                                                                                                                                                                                                                                                                                                                                                                                                                                                                            | Vertigo induced by hyperactivity of liver-YANG, with the symptoms of dizziness, headache, stiff neck and hypertension | [13] |
| Kangshuan Zaizao Pill                    | <i>Ginseng radix et rhizome rubra</i> (Hongshen), <i>Astragali radix</i> (Huangqi), <i>Arisaematis rhizoma</i> (Dannanxing, processed with bile), <i>Manis squama</i> (Chuanshanjia, processed), <i>Bovis calculus</i> (Niuhuang), <i>Borneolum Syntheticum</i> (Bingpian), <b>Hirudo</b> (Shuizhi, processed), <i>Moschus</i> (Shexiang), <i>Salviae miltiorrhizae radix et rhizoma</i> (Danshen), <i>Notoginseng radix et rhizoma</i> (Sanqi), <i>Rhei radix et rhizoma</i> (Dahuang), <i>Pheretima</i> (Dilong), <i>Styrax</i> (Suhexiang), <i>Scorpio</i> (Quanxie), <i>Puerariae lobatae radix</i> (Gegen), <i>Dioscoreae nipponicae rhizoma</i> (Chuanshanlong), <i>Angelicae sinensis radix</i> (Danggui), <i>Achyranthis bidentatae radix</i> (Niuxi), <i>Polygoni multiflori radix</i> (Heshouwu), <i>Zaocys</i> (Wushaoshe), <i>Persicae semen</i> (Taoren), <i>Cinnabaris</i> (Zhusha), <i>Carthami Flos</i> (Honghua), <i>Eupolyphaga</i> or <i>Steleophaga</i> (Tubeichong), <i>Gastrodiae rhizoma</i> (Tianma), <i>Asari radix et rhizoma</i> (Xixin), <i>Clematidis radix et rhizoma</i> (Weilingxian), <i>Alpiniae katsumadai semen</i> (Caodoukou), <i>Glycyrrhizae radix et rhizoma</i> (Gancao) | Cerebral infarction recovery stage                                                                                    | [14] |
| Nangchong Pill                           | <i>Poria</i> (Fuling), <b>Hirudo</b> (Shuizhi, processed), <i>Omphalia</i> (Leiwan), <i>Rhei radix et rhizoma</i> (Dahuang), <i>Bombyx batryticatus</i> (Jiangchan, fried), <i>Persicae semen</i> (Taoren), <i>Coptidis rhizome</i> (Huanglian), <i>Moutan cortex</i> (Mudanpi), <i>Aconiti radix</i> (Chuanwu), Genkwa                                                                                                                                                                                                                                                                                                                                                                                                                                                                                                                                                                                                                                                                                                                                                                                                                                                                                            | cysticercosis, cerebral cysticercosis and their                                                                       | [14] |

|                                  |                                                                                                                                                                                                                                                                                                                                                                                                                                                                                                                                                                                                                                                                                                                                                                                                                                                                                                                   |                                                                                                       |              |
|----------------------------------|-------------------------------------------------------------------------------------------------------------------------------------------------------------------------------------------------------------------------------------------------------------------------------------------------------------------------------------------------------------------------------------------------------------------------------------------------------------------------------------------------------------------------------------------------------------------------------------------------------------------------------------------------------------------------------------------------------------------------------------------------------------------------------------------------------------------------------------------------------------------------------------------------------------------|-------------------------------------------------------------------------------------------------------|--------------|
|                                  | flos (processed with vinegar), <i>Citri grandis exocarpium</i> (Huajuhong), <i>Faeces trogopteroni</i> extract (Wulingzhi Liujiangao)                                                                                                                                                                                                                                                                                                                                                                                                                                                                                                                                                                                                                                                                                                                                                                             | related epilepsy                                                                                      |              |
| Shexiang kangshuan Pill, Capsule | <i>Moschus artificialis</i> (Rengong Shexiang), <i>Saigae Tataricae Cornu</i> (Lingyangjiao), <i>Scorpio</i> (Quanxie), <i>Zaocys</i> (Wushaoshe), <i>Notoginseng radix et rhizoma</i> (Sanqi), <i>Bombyx batryticatus</i> (Jiangchan), <b><i>Hirudo</i></b> (Shuizhi, processed), <i>Chuanxiong rhizome</i> (Chuanxiong), <i>Gastrodiae rhizoma</i> (Tianma), <i>Rhei radix et rhizoma</i> (Dahuang), <i>Carthami Flos</i> (Honghua), <i>Arisaematis rhizoma</i> (Dannanxing, processed with bile), <i>Spatholobi caulis</i> (Jixueteng), <i>Paeoniae radix rubra</i> (Chishao), <i>Puerariae lobatae radix</i> (Gegen), <i>Rehmanniae radix</i> (Dihuang), <i>Astragali radix</i> (Huangqi), <i>Lonicerae japonicae caulis</i> (Rendongteng), <i>Angelicae sinensis radix</i> (Danggui), <i>Trachelospermi caulis et folium</i> (Luoshiteng), <i>Pheretima</i> (Dilong), <i>Siegesbeckiae herba</i> (Xixiancao) | Stroke, hemiplegia, alalia, and dizziness                                                             | [13]<br>[14] |
| Naosaitong Pill                  | <i>Toxicodendri resina carbonisatus</i> (Ganqi Tan), <i>Ginseng radix et rhizome rubra</i> (Hongshen), <i>Astragali radix</i> (Huangqi), <i>Achyranthis bidentatae radix</i> (Niuxi), <i>Trichosanthis Radix</i> (Tianhuafen), <i>Eupolyphaga</i> or <i>Steleophaga</i> (Tubeichong, fried), <i>Moutan cortex</i> (Mudanpi), <i>Rhei radix et rhizoma praeparata</i> (Zhidahuang), <i>Euodiae fructus</i> (Wuzhuyu, processed with salt), <i>Persicae semen</i> (Taoren), <i>Natrii sulfas</i> powder (Xuanmingfen), <i>Chuanxiong rhizome</i> (Chuanxiong), <i>Descurainiae semen</i> (Tinglizi), <i>Pheretima</i> (Dilong, fried), <i>Orobanche coerulescens herba</i> (Liedang, processed with wine), <i>Rehmanniae radix</i> (Dihuang), <b><i>Hirudo</i></b> (Shuizhi, processed), <i>Cinnamomi cortex</i> (Rougui), <i>Poria</i> (Fuling), <i>Succinum</i> (Hupo), <i>Cinnabaris</i> (Zhusha)                | Cerebral thrombosis, sequelae of cerebral blood stasis, limb paralysis, numbness and language barrier | [14]         |
| Naoxueshuan Tablet               | <i>Carthami Flos</i> (Honghua), <i>Angelicae sinensis radix</i> (Danggui), <b><i>Hirudo</i></b> (Shuizhi, processed), <i>Paeoniae radix rubra</i> (Chishao), <i>Persicae semen</i> (Taoren), <i>Chuanxiong rhizome</i> (Chuanxiong), <i>Salviae miltiorrhizae radix et rhizome</i> (Danshen), <i>Eupolyphaga</i> or <i>Steleophaga</i> (Tubeichong), <i>Saigae Tataricae Cornu</i> (Lingyangjiao),                                                                                                                                                                                                                                                                                                                                                                                                                                                                                                                | Stroke aura induced by blood stasis and hyperactivity of liver-Yang                                   | [14]         |

|                         |                                                                                                                                                                                                                                                                                                                                                                                                                                                                                                                                                         |                                          |     |
|-------------------------|---------------------------------------------------------------------------------------------------------------------------------------------------------------------------------------------------------------------------------------------------------------------------------------------------------------------------------------------------------------------------------------------------------------------------------------------------------------------------------------------------------------------------------------------------------|------------------------------------------|-----|
|                         | <i>Bovis calculus</i> (Niuhuang)                                                                                                                                                                                                                                                                                                                                                                                                                                                                                                                        |                                          |     |
| Loulian Capsule         | <i>Hedyotis diffusa herba</i> (Baihuashe shecao), <i>Semiaquilegiae radix</i> (Tiankuizi), <i>Polygoni orientalis fructus</i> (Shuihonghuazi), <i>Paridis rhizoma</i> (Chonglou), <i>Trionycis carapax</i> (Biejia, processed), <i>Curcuma rhizoma</i> (Ezhu), <i>Lobelia chinensis herba</i> (Banbianlian), <i>Eupolyphaga</i> or <i>Steleophaga</i> (Tubeichong), <b>Hirudo</b> (Shuizhi, processed), <i>Ginseng radix et rhizome rubra</i> (Hongshen), <i>Polygoni multiflori radix Praeparata</i> (Zhi Heshouwu), <i>Solanum nigrum</i> L (Longkui) | Auxiliary drugs for primary liver cancer | [5] |
| Peiyuan Tongnao Capsule | <i>Polygoni multiflori radix Praeparata</i> (Zhi Heshouwu), <i>Rehmanniae radix praeparata</i> (Shudihuang), <i>Asparagi radix</i> (Tiandong), <i>Trionycis carapax</i> (Biejia, processed with vinegar), <i>Cervi cornu pantotrichum</i> (Lurong), <i>Cistanches herba</i> (Roucongrong, processed with wine), <i>Cinnamomi cortex</i> (Rougui), <i>Paeoniae radix rubra</i> (Chishao), <i>Scorpio</i> (Quanxie), <b>Hirudo</b> (Shuizhi, processed), <i>Pheretima</i> (Dilong), <i>Crataegi fructus</i> (Shanzha, fried)                              | Ischemic stroke                          | [5] |
| Xizhi Luoda Capsule     | <i>Siegesbeckiae herba</i> (Xixiancao, processed with honey), <b>Hirudo</b> (Shuizhi), <i>Pinelliae rhizoma</i> (Banxia, processed with ginger), <i>Gentiana macrophyllae radix</i> (Qinjiao), <i>Gastrodiae rhizoma</i> (Tianma), <i>Eupolyphaga</i> or <i>Steleophaga</i> (Tubeichong), <i>Notoginseng radix et rhizoma</i> (Sanqi), <i>Chuanxiong rhizome</i> (Chuanxiong), <i>Carthami Flos</i> (Honghua), <i>Borneolum Syntheticum</i> (Bingpian)                                                                                                  | Ischemic stroke                          | [5] |
| Anluo Huaxian Pill      | <i>Rehmanniae radix</i> (Dihuang), <i>Notoginseng radix et rhizoma</i> (Sanqi), <b>Hirudo</b> (Shuizhi), <i>Bombyx batryticatus</i> (Jiangchan), <i>Atractylodis macrocephalae rhizoma</i> (Baizhu), <i>Curcuma radix</i> (Yujin), <i>Bovis calculus</i> (Niuhuang), <i>Arcae concha</i> (Walengzi), <i>Rhei radix et rhizoma</i> (Dahuang), <i>Hordei fructus germinatus</i> (Maiya), <i>Galli gigerii endothelium corneum</i> (Jineiijin), Powdered <i>buffalo horn</i> extract (Shuiniujiao)                                                         | Chronic hepatitis B                      | [5] |

|                         |                                                                                                                                                                                                                                                                                                                                                                                                                                                                                                                                                                                          |                                                        |     |
|-------------------------|------------------------------------------------------------------------------------------------------------------------------------------------------------------------------------------------------------------------------------------------------------------------------------------------------------------------------------------------------------------------------------------------------------------------------------------------------------------------------------------------------------------------------------------------------------------------------------------|--------------------------------------------------------|-----|
|                         | Nongsuofen), <i>Pheretima</i> (Dilong), <i>Moutan cortex</i> (Mudanpi)                                                                                                                                                                                                                                                                                                                                                                                                                                                                                                                   |                                                        |     |
| Danqi Piantan Capsule   | <i>Astragali radix</i> (Huangqi), <i>Salviae miltiorrhizae radix et rhizome</i> (Danshen), <i>Paeoniae radix rubra</i> (Chishao), <i>Chuanxiong rhizome</i> (Chuanxiong), <i>Angelicae sinensis radix</i> (Danggui), <i>Carthami Flos</i> (Honghua), <b><i>Hirudo</i></b> (Shuizhi), <i>Eupolyphaga</i> or <i>Steleophaga</i> (Tubeichong), <i>Persicae semen</i> (Taoren), <i>Bovis calculus artifactus</i> (Rengong Niuhuang), <i>Saigae Tataricae Cornu</i> (Lingyangjiao), <i>Scorpio</i> (Quanxie), <i>Polygalae radix</i> (Yuanzhi), <i>Acori tatarinowii rhizoma</i> (Shichangpu) | Cerebral infarction recovery stage                     | [5] |
| Duzhi Pill              | <i>Eucommiae Cortex</i> (Duzhong, processed with salt), <i>Angelicae sinensis radix</i> (Danggui), <i>Rehmanniae radix</i> (Dihuang), <i>Morindae officinalis radix</i> (Bajitian), <b><i>Hirudo</i></b> (Shuizhi, processed), <i>Cynanchi Atrati Radix et Rhizoma</i> (Baiwei), <i>Epimedii folium</i> (Yinyanghuo), <i>Paeoniae radix rubra</i> (Chishao), <i>Acori tatarinowii rhizoma</i> (Shichangpu), <i>Astragali radix</i> (Huangqi), <i>Leonuri Herba</i> (Yimucao), <i>Lycopodii herba</i> (Shenjincao)                                                                        | Cerebral infarction recovery stage                     | [5] |
| Huangzhi Yishen Capsule | <i>Astragali radix</i> (Huangqi), <i>Lycii fructus</i> (Gouqizi), <i>Dioscoreae rhizome</i> (Shanyao), <i>Coicis semen</i> (Yiyiren), <i>Scrophulariae radix</i> (Xuanshen), <i>Glehniae radix</i> (Beishashen), <i>Ecliptae herba</i> (Mohanlian), <i>Hominis placenta</i> (Ziheche), <i>Eucommiae Cortex</i> (Duzhong), <i>Notoginseng radix et rhizoma</i> (Sanqi), <i>Leonuri Herba</i> (Yimucao), <b><i>Hirudo</i></b> (Shuizhi), <i>Cicadae periostracum</i> (Chantui), <i>Plantaginis semen</i> (Cheqianzi), <i>Achyranthis bidentatae radix</i> (Niuxi)                          | Nephritis induced by Qi-Yin deficiency or blood stasis | [5] |
| Longshengzhi Capsule    | <i>Astragali radix</i> (Huangqi), <b><i>Hirudo</i></b> (Shuizhi), <i>Chuanxiong rhizome</i> (Chuanxiong), <i>Angelicae sinensis radix</i> (Danggui), <i>Carthami Flos</i> (Honghua), <i>Paeoniae radix rubra</i> (Chishao), <i>Aucklandiae radix</i> (Muxiang), <i>Acori tatarinowii rhizoma</i> (Shichangpu), <i>Pheretima</i> (Dilong), <i>Taxilli herba</i> (Sangjisheng), <i>Persicae semen</i> (Taoren),                                                                                                                                                                            | Cerebral infarction induced by arterialsclerosis       | [5] |

|                               |                                                                                                                                                                                                                                                                                                                                                                                                                                                                                                                                                                                                              |                                                                                                                                                  |             |
|-------------------------------|--------------------------------------------------------------------------------------------------------------------------------------------------------------------------------------------------------------------------------------------------------------------------------------------------------------------------------------------------------------------------------------------------------------------------------------------------------------------------------------------------------------------------------------------------------------------------------------------------------------|--------------------------------------------------------------------------------------------------------------------------------------------------|-------------|
|                               | <i>Acanthopanax senticosi radix et rhizome seu caulis</i> extract (Ciwujia extract)                                                                                                                                                                                                                                                                                                                                                                                                                                                                                                                          |                                                                                                                                                  |             |
| Tiaozhi Tablet                | <i>Polygoni multiflori radix Praeparata</i> (Zhi Heshouwu), <i>Cassiae semen</i> (Juemingzi), <i>Artemisiae scopariae herba</i> (Yinchen), <b>Hirudo</b> (Shuizhi), <i>Crataegi fructus</i> (Shanzha), <i>Rhei radix et rhizoma</i> (Dahuang, processed with wine), <i>Curcumae radix</i> (Yujin)                                                                                                                                                                                                                                                                                                            | Primary hyperlipemia                                                                                                                             | [5]         |
| Lishui Tiaozhi Capsule        | <i>Pinelliae rhizoma</i> (Fabanxia, processed), <i>Citri reticulatae pericarpium</i> (Chenpi), <i>Chuanxiong rhizome</i> (Chuanxiong), <b>Hirudo</b> (Shuizhi)500g <i>Poria</i> (Fuling), <i>Glycyrrhizae radix et rhizoma</i> (Gancao), bamboo juice                                                                                                                                                                                                                                                                                                                                                        | Hyperlipemia                                                                                                                                     | [5]         |
| Qishen Capsule                | <i>Astragali radix</i> (Huangqi), <i>Ginseng Radix et Rhizoma</i> (Renshen), <i>Notoginseng radix et rhizoma</i> (Sanqi), <i>Carthami Flos</i> (Honghua), <i>Crataegi fructus</i> (Shanzha), <i>Polygoni multiflori radix Praeparata</i> (Zhi Heshouwu), <i>Scutellariae radix</i> (Huangqin), <i>Glycyrrhizae radix et rhizoma</i> (Gancao), <i>Salviae miltiorrhizae radix et rhizome</i> (Danshen), <i>Poria</i> (Fuling), <b>Hirudo</b> (Shuizhi), <i>Chuanxiong rhizoma</i> (Chuanxiong), <i>Typhae pollen</i> (Puhuang), <i>Puerariae lobatae radix</i> (Gegen), <i>Scrophulariae radix</i> (Xuanshen) | Benefiting Qi and promoting blood circulation, removing stasis and relieving pain. For the treatment of coronary disease and angina              | [13]        |
| Tongxinluo Tablet, Capsule    | <i>Ginseng Radix et Rhizoma</i> (Renshen), <b>Hirudo</b> (Shuizhi), <i>Scorpio</i> (Quanxie), <i>Paeoniae radix rubra</i> (Chishao), <i>Cicadae periostacum</i> (Chantui), <i>Eupolyphaga</i> or <i>Steleophaga</i> (Tubeichong), <i>Scolopendra</i> (Wugong), <i>Santali albi lignum</i> (Tanxiang), <i>Dalbergiae odoriferae lignum</i> (Jiangxiang), <i>Olibanum</i> (Ruxiang, processed), <i>Ziziphi spinosae semen</i> (Suanzaoren, fried), <i>Borneolum Syntheticum</i> (Bingpian)                                                                                                                     | Benefiting Qi and promoting blood circulation, dredging collaterals and relieving pain. For the treatment of angina pectoris and ischemic stroke | [5]<br>[13] |
| Shenxian Shengmai Oral Liquid | <i>Ginseng radix et rhizome rubra</i> (Hongshen), <i>Lycii fructus</i> (Gouqizi), <i>Salviae miltiorrhizae radix et rhizoma</i> (Danshen), <i>Epimedii folium</i> (Yinyanghuo), <i>Ephedrae herba</i> (Mahuang), <b>Hirudo</b> (Shuizhi), <i>Psoraleae fructus</i> (Buguzhi, processed with salt), <i>Asari radix et rhizoma</i> (Xixin)                                                                                                                                                                                                                                                                     | Promoting blood circulation and removing stasis                                                                                                  | [5]         |



|                           |                                                                                                                                                                                                                                                                                                                                                                                                                                                                                                                                                                                                                                                                                                                                                                                                                                                                |                                                                                                                                                                       |
|---------------------------|----------------------------------------------------------------------------------------------------------------------------------------------------------------------------------------------------------------------------------------------------------------------------------------------------------------------------------------------------------------------------------------------------------------------------------------------------------------------------------------------------------------------------------------------------------------------------------------------------------------------------------------------------------------------------------------------------------------------------------------------------------------------------------------------------------------------------------------------------------------|-----------------------------------------------------------------------------------------------------------------------------------------------------------------------|
| Kangshuan Capsule         | <p><i>Angelicae sinensis radix</i> (Danggui), <i>Salviae miltiorrhizae radix et rhizoma</i> (Danshen), <i>Bombyx batryticatus</i> (Jiangchan, fried), <i>Gekko japonicus Dumeril et Bibron</i> (Bihu), <i>Eupolyphaga</i> or <i>Steleophaga</i> (Tubeichong), <i>Scolopendra</i> (Wugong), <b>Hirudo</b> (Shuizhi), <i>Vespaes nidus</i> (Fengfang), <i>Pheretima</i> (Dilong), <i>Strychni semen Praeparata</i> (Zhi Maqianzi), <i>Moschus</i> (Shexiang), Toad venom (Chansu, processed with wine), <i>Glycyrrhizae radix et rhizoma</i> (Gancao), <i>Smilacis glabrae rhizoma</i> (Tufuling), <i>Corydalis yanhusuo</i> (Yanhusuo, processed with vinegar), <i>Dryariae rhizoma Praeparata</i> (Zhi Gusuibu), <i>Zaocys</i> (Wushaoshe, processed with wine), <i>Tabanus</i> (Mengchong), <i>Squama manitis</i> (Chuanshanjia, processed with hot sand)</p> | Promoting blood circulation and removing stasis. For the treatment of thromboangiitis obliterans [14]                                                                 |
| Mailuo Shutong Granule    | <p><i>Astragali radix</i> (Huangqi), <i>Lonicerae japonicae flos</i> (Jinyinhua), <i>Phellodendri chinensis cortex</i> (Huangbo), <i>Atractylodis rhizoma</i> (Cangzhu), <i>Coicis semen</i> (Yiyiren), <i>Scrophulariae radix</i> (Xuanshen), <i>Angelicae sinensis radix</i> (Danggui), <i>Paeoniae radix alba</i> (Baishao), <i>Glycyrrhizae radix et rhizoma</i> (Gancao), <b>Hirudo</b> (Shuizhi), <i>Scolopendra</i> (Wugong), <i>Scorpio</i> (Quanxie)</p>                                                                                                                                                                                                                                                                                                                                                                                              | Heat-clearing and detoxifying, disperse blood stasis and dredge collateral, expelling damp and removing edema. For the treatment of superficial thrombophlebitis [14] |
| Zhiloushu Pill            | <p><i>Rhei radix et rhizoma</i> (Dahuang), <i>Scorpio</i> (Quanxie), <i>Vespaes nidus carbonisatus</i> (Fengfang Tan), <i>Bombyx batryticatus</i> (Jiangchan, fried), <i>Scolopendra</i> (Wugong), <b>Hirudo</b> (Shuizhi, fried), <i>Sophorae flos</i> (Huai hua, fried), <i>Pharbitidis semen</i> (Qianniuzi), <i>Crinis carbonisatus</i> (Xueyutan), <i>Eupolyphaga</i> or <i>Steleophaga</i> (Tubeichong, fried with wine)</p>                                                                                                                                                                                                                                                                                                                                                                                                                             | Heat-clearing and expelling damp. Treating internal hemorrhoid in the early stage, mixed hemorrhoid and archosyrinx. [5]                                              |
| Shenhailong Pill, Capsule | <p><i>Syngnathus</i> (Hailong), <i>Hippocampus</i> (Haima), <i>Cervi cornu pantotrichum</i> (Lurong), <i>Cnidii fructus</i> (Shechuangzi), <i>Epimedii folium</i> (Yinyanghuo), <i>Cistanches herba</i> (Roucongrong), <i>Schisandrae Chinensis Fructus</i> (Wuweizi), <i>Ginseng Radix et Rhizoma</i> (Renshen), <i>Astragali radix</i> (Huangqi), <i>Jujubae fructus</i> (Dazao), <i>Poria</i> (Fuling), <i>Amomi fructus</i> (Sharen), <i>Dioscoreae rhizoma</i> (Shanyao), <i>Zingiberis Rhizoma</i> (Ganjiang),</p>                                                                                                                                                                                                                                                                                                                                       | Warmly invigorating kidney-Yang. Treating related diseases induced by kidney-Yang deficiency. [14]                                                                    |

|                       |                                                                                                                                                                                                                                                                                                                                                                                                                                                                                                                                                                                                                                                                                                                                                                                                                                                                                                                  |                                                                                                                                 |
|-----------------------|------------------------------------------------------------------------------------------------------------------------------------------------------------------------------------------------------------------------------------------------------------------------------------------------------------------------------------------------------------------------------------------------------------------------------------------------------------------------------------------------------------------------------------------------------------------------------------------------------------------------------------------------------------------------------------------------------------------------------------------------------------------------------------------------------------------------------------------------------------------------------------------------------------------|---------------------------------------------------------------------------------------------------------------------------------|
|                       | <p><i>Aconiti lateralis radix praeparata</i> (Fuzi), <i>Angelicae sinensis radix</i> (Danggui),<br/> <i>Rehmanniae radix praeparata</i> (Shudihuang), <i>Asparagi radix</i> (Tiandong),<br/> <i>Ophiopogonis radix</i> (Maidong), <i>Lycii fructus</i> (Gouqizi), <i>Persicae semen</i> (Taoren),<br/> <b>Hirudo</b> (Shuizhi), <i>Moutan cortex</i> (Mudanpi), <i>Achyranthis bidentatae radix</i> (Niuxi),<br/> <i>Glycyrrhizae radix et rhizoma</i> (Gancao, processed)</p>                                                                                                                                                                                                                                                                                                                                                                                                                                   |                                                                                                                                 |
| Liaoshen Capsule      | <p>Mianyeliao, <b>Hirudo</b> (Shuizhi), <i>Corydalis yanhusuo</i> (Yanhusuo, processed with vinegar), <i>Rubiae radix et rhizome</i> (Qiancao), <i>Ginseng Radix et Rhizoma</i> (Renshen), <i>Polygoni multiflori radix</i> (Heshouwu), <i>Morindae officinalis radix</i> (Bajitian), <i>Polygonati odorati rhizoma</i> (Yuzhu), <i>Scutellariae barbatae herba</i> (Banzhilian), <i>Cremastrae pseudobulbus</i> or <i>Pleiones pseudobulbus</i> (Shancigu), <i>Sophorae tonkinensis radix et rhizoma</i> (Shandougen), <i>Pruneliae spica</i> (Xiakucao), <i>Amomi fructus</i> (Sharen), <i>Citri sarcodactylis fructus</i> (Foshou), <i>Hordei fructus germinatus</i> (Maiya)</p>                                                                                                                                                                                                                              | <p>Auxiliary drugs for esophagus [5]<br/> cancer and gastric carcinoma.</p>                                                     |
| Danguixiang Granule   | <p><i>Astragali radix</i> (Huangqi, processed), <i>Cinnamomi ramulus</i> (Guizhi), <i>Euodiae fructus</i> (Wuzhuyu) <i>Cinnamomi cortex</i> (Rougui), <i>Asari radix et rhizoma</i> (Xixin), <i>Persicae semen</i> (Taoren), <i>Carthami Flos</i> (Honghua), <i>Angelicae sinensis radix</i> (Danggui), <i>Chuanxiong rhizome</i> (Chuanxiong), <i>Paeoniae radix rubra</i> (Chishao), <i>Salviae miltiorrhizae radix et rhizome</i> (Danshen), <i>Moutan cortex</i> (Mudanpi), <i>Corydalis Yanhusuo</i> (Yanhusuo), <i>Wenyujin Rhizoma Concisum</i> (Pianjianghuang), <i>Sparganii rhizoma</i> (Sanleng), <i>Curcumae Rhizoma</i> (Ezhu), <b>Hirudo</b> (Shuizhi), <i>Aucklandiae radix</i> (Muxiang), <i>Aurantii fructus</i> (Zhiqiao), <i>Linderae radix</i> (Wuyao), <i>Coptidis rhizoma</i> (Huanglian), <i>Rehmanniae radix</i> (Dihuang), <i>Glycyrrhizae radix et rhizoma</i> (Gancao, processed)</p> | <p>Gastrosis induced by [14]<br/> deficient cold of spleen and [13]<br/> stomach as well as chronic<br/> atrophic gastritis</p> |
| Zhidan Huoluo Capsule | <p><b>Hirudo</b> (Shuizhi), <i>Salviae miltiorrhizae radix et rhizoma</i> (Danshen)</p>                                                                                                                                                                                                                                                                                                                                                                                                                                                                                                                                                                                                                                                                                                                                                                                                                          | <p>[5]</p>                                                                                                                      |

|                                 |                                                                                                                                                                                                                                                                                                                                                                                                                                                                                                                                                                                          |                                                                                                                                                                                                               |              |
|---------------------------------|------------------------------------------------------------------------------------------------------------------------------------------------------------------------------------------------------------------------------------------------------------------------------------------------------------------------------------------------------------------------------------------------------------------------------------------------------------------------------------------------------------------------------------------------------------------------------------------|---------------------------------------------------------------------------------------------------------------------------------------------------------------------------------------------------------------|--------------|
| Gongliuqing Capsule             | <i>Rhei radix et rhizoma</i> (Dahuang, processed), <i>Eupolyphaga</i> or <i>Steleophaga</i> (Tubeichong), <b>Hirudo</b> (Shuizhi)200g <i>Persicae semen</i> (Taoren), <i>Typhae pollen</i> (Puhuang), <i>Scutellariae radix</i> (Huangqin), <i>Aurantii fructus immaturus</i> (Zhishi), <i>Ostreae concha</i> (Muli), <i>Rehmanniae radix</i> (Dihuang), <i>Paeoniae radix alba</i> (Baishao), <i>Glycyrrhizae radix et rhizoma</i> (Gancao)                                                                                                                                             | Invigorating blood, removing blood stasis. For the treatment of gynecopathy diseases induced by blood stasis                                                                                                  | [14]<br>[13] |
| Ganpikang Capsule               | <i>Bupleuri radix</i> (Chaihu), <i>Astragali radix</i> (Huangqi), <i>Citri Reticulatae Pericarpium</i> (Qingpi), <i>Paeoniae radix alba</i> (Baishao), <i>Atractylodis macrocephalae rhizoma</i> (Baizhu), <i>Isatidis radix</i> (Banlangen), <i>Curcumae longae rhizoma</i> (Jianghuang), <i>Poria</i> (Fuling), <b>Hirudo</b> (Shuizhi), <i>Notoginseng radix et rhizoma</i> (Sanqi), <i>Curcumae radix</i> (Yujin), <i>Galli gigerii endothelium corneum</i> (Jineijin, fried), Powdered <i>Felursi</i> (Xiongdan fen), Powdered <i>buffalo horn</i> extract (Shuiniujiao Nongsuofen) | Soothing Liver and strengthening Spleen, invigorating blood and clearing heat. Treating stagnation of liver-Qi with deficiency of the spleen, as well as chronic hepatitis and hepatocirrhosis in early stage | [14]         |
| Shugan Yiyang Capsule           | <i>Tribuli frucuts</i> (Jili), <i>Bupleuri radix</i> (Chaihu), <i>Vespaes nidus</i> (Fengfang), <i>Pheretima</i> (Dilong), <b>Hirudo</b> (Shuizhi), <i>Aspongopus</i> (Jiuxiangchong), <i>Zixiaohua</i> , <i>Cnidii fructus</i> (Shechuangzi), <i>Polygalae radix</i> (Yuanzhi), <i>Cistanches herba</i> (Roucongrong), <i>Cuscutae semen</i> (Tusizi), <i>Schisandrae Chinensis Fructus</i> (Wuweizi), <i>Morindae officinalis radix</i> (Bajitian), <i>Scolopendra</i> (Wugong), <i>Acori tatarinowii rhizoma</i> (Shichangpu)                                                         | Functional impotence induced by liver and kidney deficiency                                                                                                                                                   | [5]          |
| Naoxueshu Oral Liquid           | <i>Astragali radix</i> (Huangqi), <i>Moutan cortex</i> (Mudanpi), <b>Hirudo</b> (Shuizhi), <i>Rhei radix et rhizoma</i> (Dahuang), <i>Acori tatarinowii rhizoma</i> (Shichangpu), <i>Chuanxiong rhizome</i> (Chuanxiong), <i>Achyranthis bidentatae radix</i> (Niuxi)                                                                                                                                                                                                                                                                                                                    | Mild and moderate hemorrhagic stroke                                                                                                                                                                          | [5]          |
| Tiandan Tongluo Tablet, Capsule | <i>Chuanxiong rhizome</i> (Chuanxiong), <i>Siegesbeckiae herba</i> (Xixiancao), <i>Salviae miltiorrhizae radix et rhizome</i> (Danshen), <b>Hirudo</b> (Shuizhi), <i>Gastrodiae rhizoma</i> (Tianma), <i>Sophorae flos</i> (Huai hua), <i>Acori tatarinowii rhizoma</i> (Shichangpu), <i>Bovis</i>                                                                                                                                                                                                                                                                                       | Stroke, cerebral infarction in acute stage, in early recovery                                                                                                                                                 | [14]         |

|                            |                                                                                                                                                                                                                                                                                                                                                                                                                                                                         |                                                                              |     |
|----------------------------|-------------------------------------------------------------------------------------------------------------------------------------------------------------------------------------------------------------------------------------------------------------------------------------------------------------------------------------------------------------------------------------------------------------------------------------------------------------------------|------------------------------------------------------------------------------|-----|
|                            | <i>calculus artifactus</i> (Rengong Niuhuang), <i>Astragali radix</i> (Huangqi), <i>Achyranthis bidentatae radix</i> (Niuxi)                                                                                                                                                                                                                                                                                                                                            | stage                                                                        |     |
| Qianlie Jiedu Capsule      | <b>Hirudo</b> (Shuizhi), <i>Rhei radix et rhizoma</i> (Dahuang, processed with wine), <i>Leonuri Herba</i> (Yimucao), <i>Taraxaci herba</i> (Pugongying), <i>Carthami Flos</i> (Honghua), <i>Pheretima</i> (Dilong), <i>Astragali radix</i> (Huangqi), <i>Angelicae sinensis radix</i> (Danggui), <i>Paeoniae radix alba</i> (Baishao), <i>Galli gigerii endothelium corneum</i> (Jineiijin), <i>Bupleuri radix</i> (Chaihu)                                            | For chronic prostatitis induced by dampness and heat as well as blood stasis | [5] |
| Xiaoke Tongmai oral liquid | <i>Astragali radix</i> (Huangqi), <i>Puerariae lobatae radix</i> (Gegen), <i>Coptidis rhizoma</i> (Huanglian), <i>Rehmanniae radix</i> (Dihuang), <i>Salviae miltiorrhizae radix et rhizome</i> (Danshen), <i>Scrophulariae radix</i> (Xuanshen), <i>Paeoniae radix alba</i> (Baishao), <b>Hirudo</b> (Shuizhi), <i>Chuanxiong rhizoma</i> (Chuanxiong), <i>Ophiopogonis radix</i> (Maidong), <i>Scutellariae radix</i> (Huangqin), <i>Cyathulae radix</i> (Chuanniuxi) | For type II diabetes and related complications                               | [5] |
